# Supplementary material for: Using a global diversity panel of Cannabis sativa L. to develop a near InfraRed-based chemometric application for cannabinoid quantification
Source: Springer Nature journal article supplement (doi:10.1038/s41598-023-29148-0), 2023-02-08
Supplement: MOESM3 [file 41598_2023_29148_MOESM3_ESM.pdf]

# Supplementary Information Figure S1

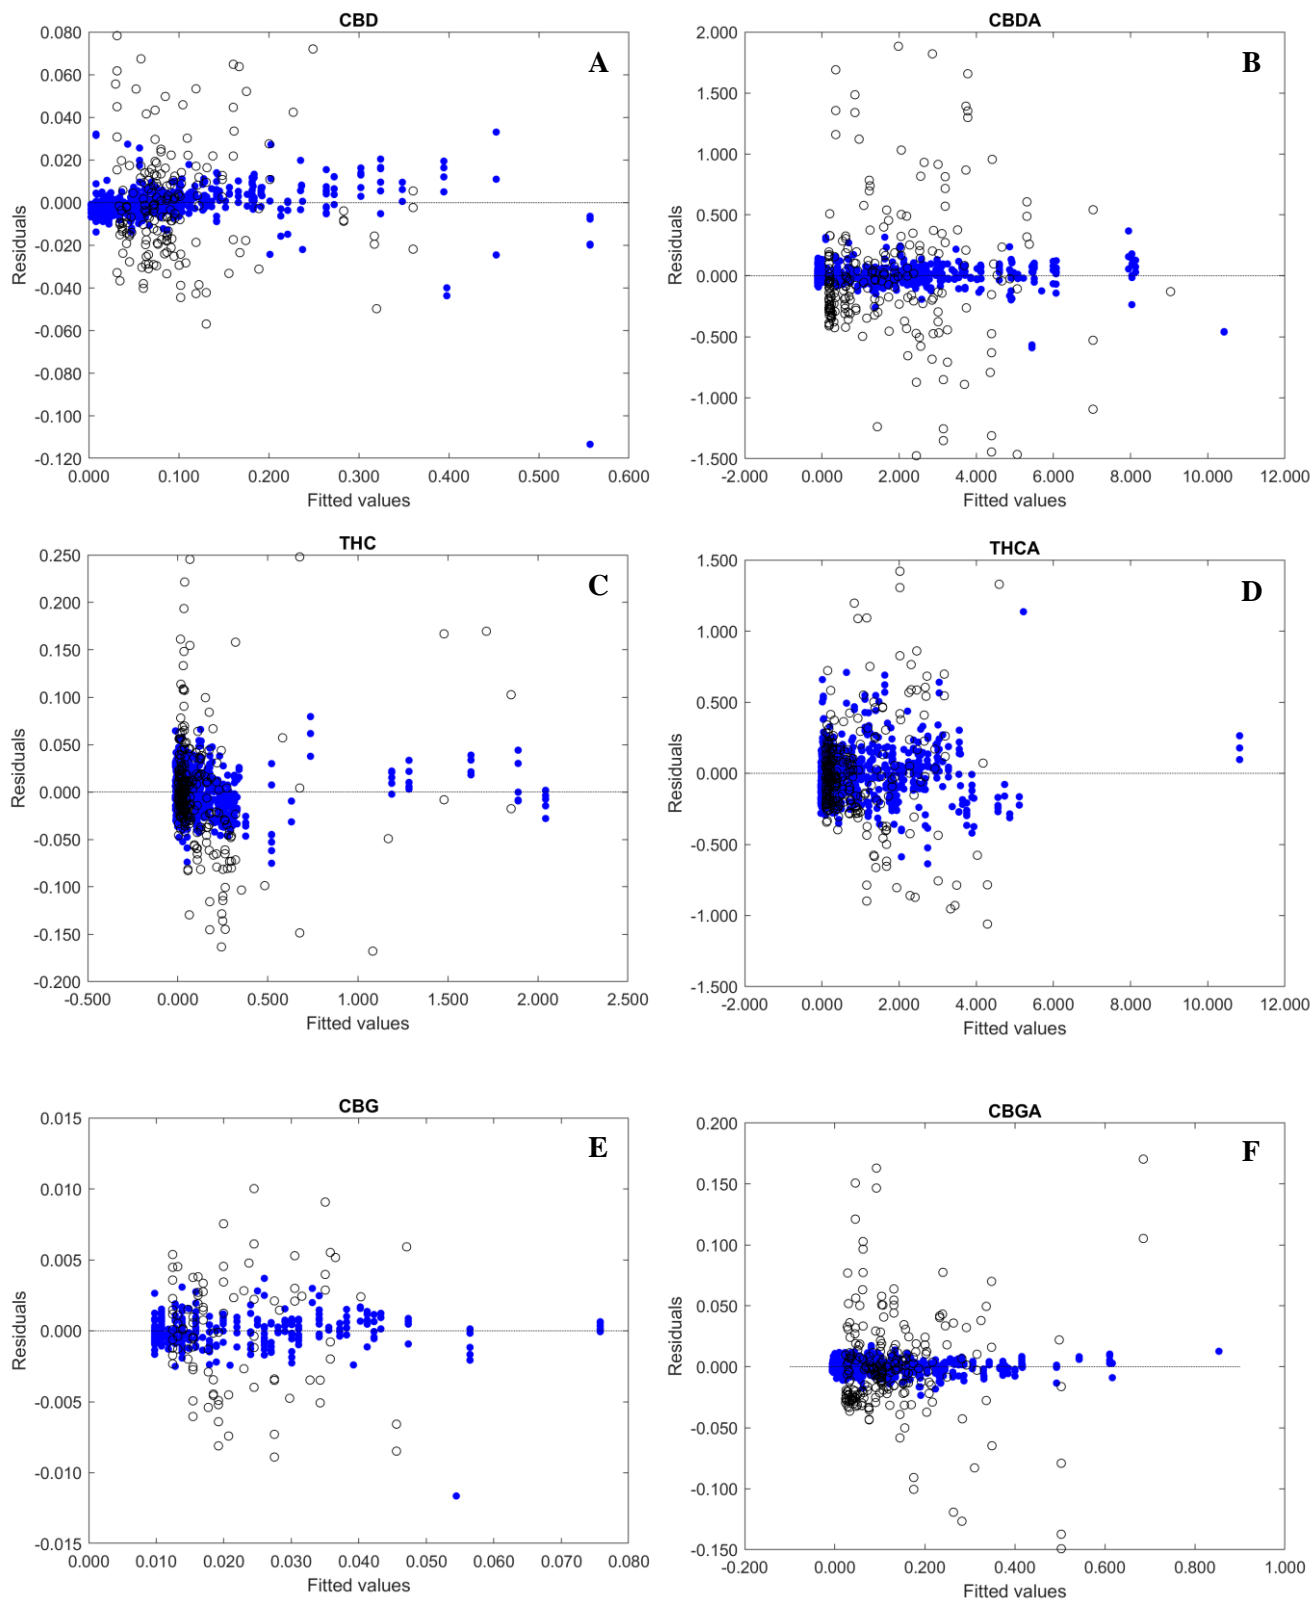

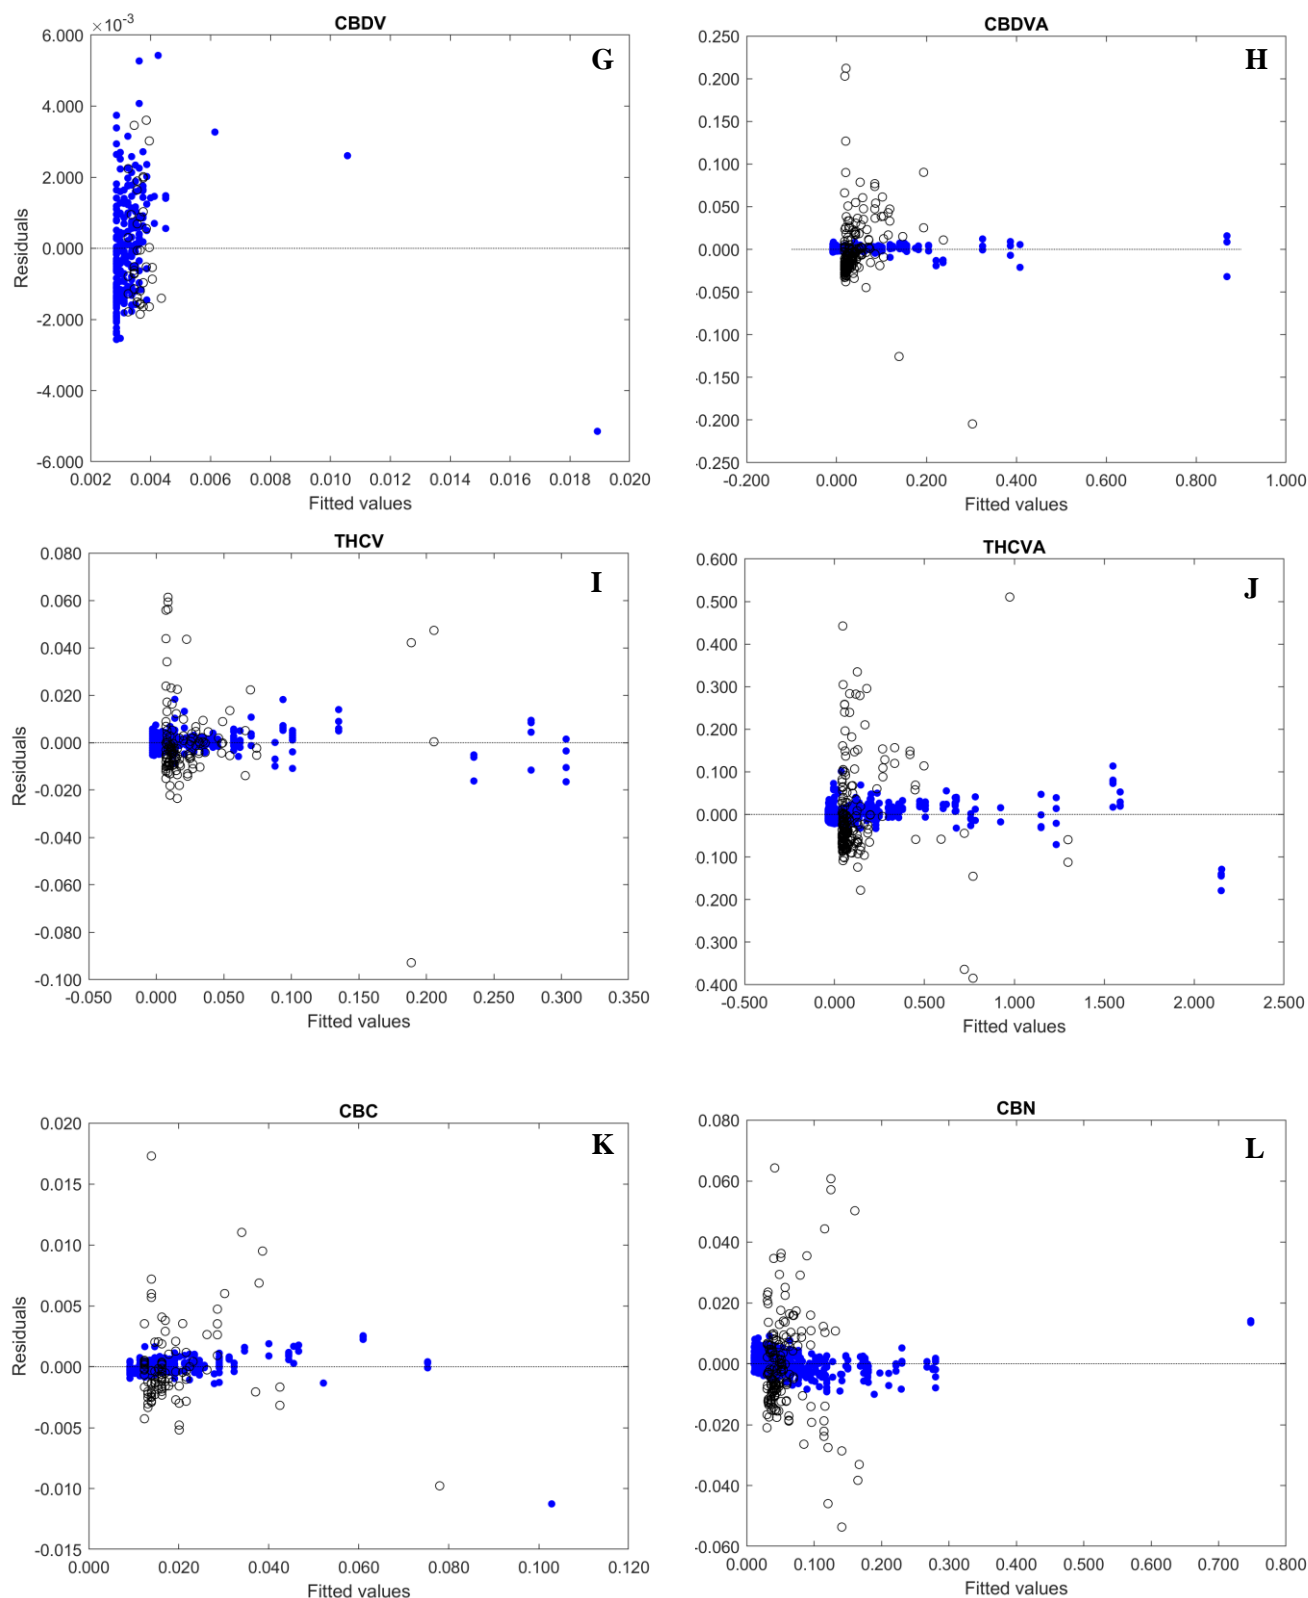

**Figure S1: Residual plots for final models of all 12 target cannabinoids.**

Residuals (y-axis) plotted against fitted values (x-axis) for Cross-validation (blue closed circles) and Hold-out validation (open circles) data of the 12 target Cannabinoids: A.) Cannabidiol (CBD) B.) Cannabidiolic acid (CBDA), C.)  $\Delta^9$ -tetrahydrocannabinol ( $\Delta^9$ -THC), D.)  $\Delta^9$ -tetrahydrocannabinolic acid ( $\Delta^9$ -THCA), E.) Cannabigerol (CBG), F.) Cannabigerolic acid (CBGA), G.) Cannabidivarin (CBDV), H.) Cannabidivarinic acid (CBDVA), I.) Tetrahydrocannabivarin (THCV), J.) Tetrahydrocannabivarinic acid (THCVA), K.) Cannabichromene (CBC), L.) Cannabinol (CBN).
