# Supplementary material for: Using a global diversity panel of Cannabis sativa L. to develop a near InfraRed-based chemometric application for cannabinoid quantification
Source: Sci Rep. 2023 Feb 8;13:2253. doi: 10.1038/s41598-023-29148-0 (PMC9908977; doi:10.1038/s41598-023-29148-0)
Supplement: Supplementary file 2 — Supplementary Information 2. [file 41598_2023_29148_MOESM2_ESM.xlsx]

## Sheet: Table S1
Table S1: Summary of the 249 samples used in this study from two germplasm collections, including accession passport data and cannabinoid contents. Lists the ID used by Southern Cross University, Lismore (SCU ID), other ID if known, variety if known, determined strain (Det. Strain) based on the chemotypic HPLC analysis, country of origin if known, number of female inflorescences samples harvested…
							Cannabinoids % (w/w)
SCU ID	Other ID	Variety	Determined	Origin	n	Bio. Rep	CBD		CBD-A		Δ9-THC		Δ9-THC-A		CBG		CBG-A		CBDV		CBDV-A		THCV		THCV-A		CBN		CBC
			type				% (w/w)	mg/g	% (w/w)	mg/g	% (w/w)	mg/g	% (w/w)	mg/g	% (w/w)	mg/g	% (w/w)	mg/g	% (w/w)	mg/g	% (w/w)	mg/g	% (w/w)	mg/g	% (w/w)	mg/g	% (w/w)	mg/g	% (w/w)	mg/g
ECO-001	na	na	Hemp	Afghanistan	3	1	0.09	0.9	1.727	17.27	0.025	0.25	0.06	0.6	0.001	0.01	0.039	0.39	0.002	0.02	0.017	0.17	Not quantified		0.001	0.01	0.044	0.44	0.008	0.08
						2	0.182	1.82	3.295	32.95	0.04	0.4	0.117	1.17	0.007	0.07	0.052	0.52	0.006	0.06	0.032	0.32	Not quantified		0.002	0.02	0.14	1.4	0.013	0.13
						3	0.254	2.54	3.68	36.8	0.043	0.43	0.127	1.27	0.007	0.07	0.074	0.74	0.007	0.07	0.033	0.33	0.001	0.01	0.002	0.02	0.225	2.25	0.019	0.19
ECO-002	na	na	Hemp/Fibre	France	1	1	0.102	1.02	0.565	5.65	0.108	1.08	0.367	3.67	0.016	0.16	0.067	0.67	0.006	0.06	0.006	0.06	0.005	0.05	0.015	0.15	0.03	0.3	0.01	0.1
ECO-003	na	na	Hemp	China	3	1	0.001	0.01	0.007	0.07	0.037	0.37	0.353	3.53	0.001	0.01	0.021	0.21	Not detected		Not detected		0.007	0.07	0.116	1.16	0.005	0.05	0.001	0.01
						2	Not detected		0.003	0.03	0.019	0.19	0.423	4.23	Not quantified		0.02	0.2	Not detected		Not detected		0.001	0.01	0.019	0.19	Not detected		Not detected
						3	0.001	0.01	0.002	0.02	0.035	0.35	0.444	4.44	Not quantified		0.024	0.24	Not detected		Not detected		0.014	0.14	0.227	2.27	0.005	0.05	0.004	0.04
ECO-004	na	na	Hemp	China	1	1	0.022	0.22	0.487	4.87	0.038	0.38	0.266	2.66	Not quantified		0.012	0.12	0.001	0.01	0.042	0.42	0.005	0.05	0.044	0.44	0.001	0.01	0.006	0.06
ECO-005	na	na	Hemp	Italy	1	1	0.028	0.28	0.582	5.82	0.005	0.05	0.056	0.56	0.002	0.02	0.006	0.06	Not detected		0.002	0.02	Not detected		Not detected		0.011	0.11	0.001	0.01
ECO-006	na	na	Drug	United Kingdom	2	1	0.003	0.03	0.007	0.07	0.287	2.87	1.813	18.13	0.014	0.14	0.224	2.24	0.007	0.07	0.003	0.03	0.003	0.03	0.024	0.24	0.036	0.36	0.003	0.03
						2	0.006	0.06	0.01	0.1	0.297	2.97	3.483	34.83	0.075	0.75	0.242	2.42	0.001	0.01	0.001	0.01	0.012	0.12	0.198	1.98	0.039	0.39	0.014	0.14
ECO-007	na	na	Hemp	China	2	1	0.008	0.08	0.038	0.38	0.013	0.13	0.04	0.4	Not detected		0.004	0.04	0.004	0.04	0.018	0.18	0.007	0.07	0.022	0.22	0.002	0.02	0.002	0.02
						2	0.001	0.01	0.01	0.1	0.038	0.38	0.153	1.53	Not quantified		0.014	0.14	Not detected		Not detected		0.015	0.15	0.056	0.56	0	0	0.003	0.03
ECO-008	na	na	Hemp	Afghanistan	3	1	0.023	0.23	0.426	4.26	0.026	0.26	0.162	1.62	0.001	0.01	0.015	0.15	0.001	0.01	0.002	0.02	Not detected		0.002	0.02	0.763	7.63	0.002	0.02
						2	0.015	0.15	0.204	2.04	0.028	0.28	0.086	0.86	Not quantified		0.008	0.08	0.001	0.01	0.001	0.01	Not detected		0.001	0.01	0.052	0.52	0.001	0.01
						3	0.022	0.22	0.463	4.63	0.016	0.16	0.161	1.61	Not quantified		0.008	0.08	0.001	0.01	0.002	0.02	Not detected		0.002	0.02	0.021	0.21	0.001	0.01
ECO-009	na	na	Drug	North America	3	1	0.003	0.03	0.021	0.21	0.167	1.67	0.612	6.12	Not detected		0.001	0.01	Not detected		0.001	0.01	Not quantified		0.008	0.08	0.02	0.2	0.002	0.02
						2	0.003	0.03	0.014	0.14	0.275	2.75	3.67	36.7	0.038	0.38	0.165	1.65	0.005	0.05	0.002	0.02	0.002	0.02	0.047	0.47	0.047	0.47	0.003	0.03
						3	0.005	0.05	0.054	0.54	0.09	0.9	1.455	14.55	Not detected		0.003	0.03	Not detected		0.001	0.01	Not quantified		0.014	0.14	0.024	0.24	0.005	0.05
ECO-010	na	na	Drug	Netherlands	3	1	Not quantified		0.005	0.05	0.131	1.31	1.206	12.06	0.009	0.09	0.035	0.35	0.007	0.07	0.008	0.08	0.001	0.01	0.012	0.12	0.092	0.92	0.004	0.04
						2	0.055	0.55	1.241	12.41	0.111	1.11	1.249	12.49	0.022	0.22	0.079	0.79	0.003	0.03	0.007	0.07	Not quantified		0.018	0.18	0.064	0.64	0.001	0.01
						3	Not detected		0.005	0.05	0.12	1.2	1.03	10.3	0.005	0.05	0.028	0.28	0.004	0.04	0.004	0.04	0.001	0.01	0.013	0.13	0.109	1.09	0.009	0.09
ECO-011	na	na	Drug	Netherlands	2	1	0.001	0.01	0.004	0.04	0.075	0.75	1.217	12.17	0.005	0.05	0.017	0.17	Not detected		Not detected		Not quantified		0.013	0.13	0.04	0.4	Not detected
						2	0.001	0.01	0.003	0.03	0.229	2.29	1.439	14.39	0.005	0.05	0.057	0.57	0.004	0.04	0.001	0.01	0.001	0.01	0.024	0.24	0.038	0.38	0.002	0.02
ECO-012	na	na	Hemp	China	3	1	0.001	0.01	0.003	0.03	0.049	0.49	0.352	3.52	0.002	0.02	0.029	0.29	0.001	0.01	0.002	0.02	0.007	0.07	0.052	0.52	0.004	0.04	0.004	0.04
						2	Not detected		0.003	0.03	0.035	0.35	0.368	3.68	Not quantified		0.019	0.19	0.001	0.01	0.002	0.02	0.004	0.04	0.039	0.39	0.001	0.01	0.003	0.03
						3	0.019	0.19	0.435	4.35	0.038	0.38	0.26	2.6	0.002	0.02	0.026	0.26	0.008	0.08	0.228	2.28	0.027	0.27	0.218	2.18	0.034	0.34	0.004	0.04
ECO-013	na	na	Hemp	China	1	1	0.007	0.07	0.233	2.33	0.02	0.2	0.306	3.06	0.001	0.01	0.023	0.23	Not quantified		0.008	0.08	Not quantified		0.02	0.2	0.007	0.07	0.006	0.06
ECO-014	na	na	Hemp	China	3	1	0.005	0.05	0.043	0.43	0.063	0.63	0.512	5.12	0.001	0.01	0.028	0.28	Not detected		Not detected		0.26	2.6	1.01	10.1	0.029	0.29	0.009	0.09
						2	0.002	0.02	0.004	0.04	0.024	0.24	0.296	2.96	0.002	0.02	0.011	0.11	Not detected		0.001	0.01	0.024	0.24	0.566	5.66	Not quantified		0.015	0.15
						3	0.004	0.04	0.002	0.02	0.031	0.31	0.393	3.93	0.008	0.08	0.016	0.16	Not detected		0.002	0.02	0.025	0.25	0.51	5.1	0.035	0.35	0.015	0.15
ECO-015	na	na	Hemp	China	2	1	0.03	0.3	0.484	4.84	0.006	0.06	0.017	0.17	0.005	0.05	0.105	1.05	0.001	0.01	0.011	0.11	Not detected		Not detected		0.035	0.35	0.008	0.08
						2	0.001	0.01	0.01	0.1	0.001	0.01	0.002	0.02	0.027	0.27	0.338	3.38	Not detected		Not detected		Not detected		Not detected		0.001	0.01	0.001	0.01
ECO-016	na	na	Hemp	Spain	3	1	Not quantified		0.005	0.05	0.164	1.64	0.559	5.59	0.011	0.11	0.037	0.37	0.002	0.02	0.002	0.02	0.001	0.01	0.009	0.09	Not quantified		0.008	0.08
						2	0.01	0.1	0.171	1.71	0.017	0.17	0.156	1.56	0.001	0.01	0.016	0.16	0.001	0.01	0.002	0.02	Not quantified		0.011	0.11	0.004	0.04	0.001	0.01
						3	0.003	0.03	0.036	0.36	0.006	0.06	0.025	0.25	Not quantified		0.004	0.04	Not detected		Not detected		Not detected		Not detected		Not detected		0.001	0.01
ECO-017	na	na	Hemp	Ukraine	2	1	0.248	2.48	1.31	13.1	0.014	0.14	0.062	0.62	0.008	0.08	0.096	0.96	0.007	0.07	0.077	0.77	Not detected		0.007	0.07	0.039	0.39	Not detected
						2	0.37	3.7	2.261	22.61	0.029	0.29	0.12	1.2	0.029	0.29	0.297	2.97	0.013	0.13	0.056	0.56	Not quantified		0.011	0.11	0.023	0.23	0.01	0.1
ECO-018	na	na	Hemp	China	3	1	0.035	0.35	0.164	1.64	0.005	0.05	0.007	0.07	0.007	0.07	0.017	0.17	0.008	0.08	0.052	0.52	0.001	0.01	0.003	0.03	0.007	0.07	0.007	0.07
						2	0.016	0.16	0.149	1.49	0.008	0.08	0.014	0.14	0.001	0.01	0.021	0.21	0.061	0.61	0.634	6.34	0.007	0.07	0.037	0.37	0.014	0.14	0.012	0.12
						3	0.021	0.21	0.07	0.7	0.009	0.09	0.006	0.06	Not quantified		0.016	0.16	0.127	1.27	0.454	4.54	0.01	0.1	0.023	0.23	0.011	0.11	0.02	0.2
ECO-019	na	na	Hemp	China	3	1	0.026	0.26	0.489	4.89	0.013	0.13	0.021	0.21	0.002	0.02	0.012	0.12	0.009	0.09	0.165	1.65	0.001	0.01	0.009	0.09	0.001	0.01	0.012	0.12
						2	0.032	0.32	0.691	6.91	0.061	0.61	0.389	3.89	0.001	0.01	0.028	0.28	0.004	0.04	0.102	1.02	0.011	0.11	0.098	0.98	0.013	0.13	0.017	0.17
						3	0.028	0.28	0.554	5.54	0.03	0.3	0.234	2.34	0.001	0.01	Not quantified		0.005	0.05	0.109	1.09	0.011	0.11	0.082	0.82	0.027	0.27	0.025	0.25
ECO-020	na	na	Drug	USA	3	1	0.006	0.06	0.035	0.35	0.214	2.14	2.484	24.84	0.02	0.2	0.37	3.7	Not detected		Not detected		0.005	0.05	0.038	0.38	Not quantified		0.006	0.06
						2	0.007	0.07	0.034	0.34	0.227	2.27	2.599	25.99	0.026	0.26	0.74	7.4	Not detected		Not detected		0.006	0.06	0.033	0.33	Not quantified		0.006	0.06
						3	0.004	0.04	0.007	0.07	0.281	2.81	0.785	7.85	0.031	0.31	0.116	1.16	Not detected		0.005	0.05	0.005	0.05	0.015	0.15	0.005	0.05	0.004	0.04
ECO-021	na	na	Hemp	China	3	1	0.003	0.03	0.001	0.01	0.025	0.25	0.234	2.34	0.001	0.01	0.019	0.19	0.003	0.03	0.003	0.03	0.055	0.55	0.764	7.64	0.088	0.88	0.005	0.05
						2	0	0	0.002	0.02	0.011	0.11	0.102	1.02	Not detected		0.005	0.05	Not detected		0.001	0.01	0.009	0.09	0.129	1.29	Not detected		0.002	0.02
						3	0.001	0.01	0.001	0.01	0.023	0.23	0.095	0.95	Not detected		0.004	0.04	Not detected		0.001	0.01	0.027	0.27	0.143	1.43	0.007	0.07	Not detected
ECO-022	na	na	Drug	China	2	1	0.001	0.01	0.003	0.03	0.112	1.12	1.483	14.83	0.003	0.03	0.044	0.44	0.001	0.01	Not quantified		0.004	0.04	0.086	0.86	0.022	0.22	0.027	0.27
						2	0.001	0.01	0.003	0.03	0.12	1.2	1.51	15.1	0.003	0.03	0.051	0.51	0.009	0.09	Not quantified		0.004	0.04	0.1	1	0.025	0.25	0.03	0.3
ECO-023	na	na	Hemp/Drug	China	3	1	0.015	0.15	0.231	2.31	0.02	0.2	0.105	1.05	0.003	0.03	0.003	0.03	0.002	0.02	0.042	0.42	0.005	0.05	0.038	0.38	0.001	0.01	0.007	0.07
						2	0.002	0.02	0.012	0.12	0.062	0.62	0.54	5.4	0.003	0.03	0.038	0.38	Not detected		Not detected		0.005	0.05	0.069	0.69	0.006	0.06	0.014	0.14
						3	0.006	0.06	0.001	0.01	0.051	0.51	0.643	6.43	0.003	0.03	0.029	0.29	Not detected		Not detected		Not quantified		0.017	0.17	0.026	0.26	0.018	0.18
ECO-024	na	na	Hemp	China	1	1	0.022	0.22	0.757	7.57	0.048	0.48	0.524	5.24	0.004	0.04	0.081	0.81	Not detected		0.003	0.03	Not detected		0.006	0.06	0.048	0.48	0.017	0.17
ECO-025	na	na	Hemp	Canada	3	1	0.001	0.01	0	0	0.223	2.23	0.108	1.08	0.001	0.01	0.059	0.59	0.004	0.04	0.002	0.02	0.022	0.22	0.005	0.05	0.001	0.01	0.001	0.01
						2	0.002	0.02	0.002	0.02	0.235	2.35	0.261	2.61	0.001	0.01	0.08	0.8	0.001	0.01	0.001	0.01	0.064	0.64	0.001	0.01	0.002	0.02	0.001	0.01
						3	0.002	0.02	0	0	0.249	2.49	0.299	2.99	Not quantified		0.044	0.44	0.005	0.05	0.002	0.02	0.082	0.82	0.005	0.05	0.002	0.02	0.001	0.01
ECO-026	na	na	Hemp	China	1	1	0.001	0.01	0.011	0.11	0.067	0.67	0.073	0.73	0.002	0.02	0.004	0.04	Not detected		Not detected		0.056	0.56	0.074	0.74	0.001	0.01	0.002	0.02
ECO-027	na	na	Drug	India	1	1	0.001	0.01	0.025	0.25	0.033	0.33	1.627	16.27	0.01	0.1	0.123	1.23	Not detected		Not detected		Not quantified		0.028	0.28	0.009	0.09	Not detected
ECO-028	na	na	Drug	Switzerland	1	1	0.001	0.01	0.012	0.12	0.12	1.2	1.349	13.49	0.008	0.08	0.033	0.33	Not detected		Not detected		0.001	0.01	0.018	0.18	0.005	0.05	Not detected
ECO-029	na	na	Drug	Afghanistan	1	1	0.02	0.2	0.561	5.61	0.043	0.43	0.424	4.24	0.005	0.05	0.079	0.79	Not quantified		0.012	0.12	0.003	0.03	0.021	0.21	0.005	0.05	Not detected
ECO-030	na	na	Drug	Canada	2	1	0.008	0.08	0.177	1.77	0.008	0.08	0.103	1.03	Not quantified		0.008	0.08	Not quantified		0.004	0.04	Not detected		0.006	0.06	0.004	0.04	Not detected
						2	0.001	0.01	0.022	0.22	0.208	2.08	1.707	17.07	0.042	0.42	0.085	0.85	Not detected		0.001	0.01	0.002	0.02	0.021	0.21	0.045	0.45	0.013	0.13
ECO-031	na	na	Drug	USA	3	1	0.005	0.05	0.019	0.19	0.186	1.86	3.306	33.06	0.008	0.08	0.105	1.05	Not detected		Not detected		0.004	0.04	0.039	0.39	0.016	0.16	0.007	0.07
						2	Not detected		Not detected		0.26	2.6	1.957	19.57	0.007	0.07	0.064	0.64	0.003	0.03	Not quantified		Not detected		0.019	0.19	0.048	0.48	0.004	0.04
						3	0.005	0.05	0.017	0.17	0.168	1.68	2.87	28.7	0.007	0.07	0.092	0.92	Not detected		Not quantified		0.004	0.04	0.035	0.35	0.015	0.15	0.007	0.07
ECO-032	na	na	Drug	na	2	1	0.015	0.15	0.029	0.29	0.122	1.22	1.019	10.19	Not detected		Not detected		Not detected		0.001	0.01	Not detected		0.013	0.13	0.034	0.34	0.004	0.04
						2	0.015	0.15	0.029	0.29	0.121	1.21	1.009	10.09	Not detected		Not detected		Not detected		0.001	0.01	0.001	0.01	0.013	0.13	0.035	0.35	0.004	0.04
ECO-033	na	na	Drug	na	1	1	0.005	0.05	0.017	0.17	0.128	1.28	5.092	50.92	0.028	0.28	0.048	0.48	Not detected		Not detected		0.014	0.14	0.039	0.39	0.036	0.36	0.013	0.13
ECO-034	na	na	Hemp	China	2	1	0.028	0.28	1.042	10.42	0.007	0.07	0.044	0.44	0.004	0.04	0.045	0.45	0.004	0.04	0.112	1.12	Not detected		0.006	0.06	Not quantified		0.015	0.15
						2	0.029	0.29	0.198	1.98	0.04	0.4	0.119	1.19	0.001	0.01	0.006	0.06	Not detected		0.001	0.01	Not detected		0.003	0.03	0.001	0.01	Not detected
ECO-035	na	na	Hemp	na	2	1	0.014	0.14	0.027	0.27	0.21	2.1	1.13	11.3	Not detected		Not detected		Not detected		Not detected		Not quantified		0.013	0.13	0.07	0.7	0.002	0.02
						2	0.014	0.14	0.027	0.27	0.122	1.22	1.117	11.17	Not detected		Not detected		Not detected		Not detected		Not quantified		0.013	0.13	0.058	0.58	0.002	0.02
ECO-036	na	na	Drug	na	1	1	0.001	0.01	0.044	0.44	0.007	0.07	0.056	0.56	Not quantified		0.011	0.11	Not detected		0.001	0.01	0.032	0.32	0.226	2.26	0.006	0.06	0.003	0.03
SC1900002	IPK_CAN_17	na	Mainly Hemp	Hungary	6	1	0.047	0.47	1.842	18.42	0.019	0.19	0.072	0.72	0.006	0.06	0.086	0.86	0.005	0.05	0.091	0.91	0.003	0.03	0.006	0.06	0.082	0.82	0.007	0.07
						2	0.035	0.35	1.444	14.44	0.097	0.97	1.553	15.53	0.006	0.06	0.321	3.21	0.004	0.04	0.023	0.23	0.003	0.03	0.048	0.48	0.127	1.27	0.056	0.56
						3	0.06	0.6	2.104	21.04	0.02	0.2	0.134	1.34	0.006	0.06	0.126	1.26	0.003	0.03	0.083	0.83	0.001	0.01	0.004	0.04	0.058	0.58	0.016	0.16
						4	0.049	0.49	1.679	16.79	0.02	0.2	0.07	0.7	0.004	0.04	0.089	0.89	0.003	0.03	0.075	0.75	0.001	0.01	0.002	0.02	0.098	0.98	0.025	0.25
						5	0.049	0.49	1.678	16.78	0.02	0.2	0.07	0.7	0.004	0.04	0.089	0.89	0.004	0.04	0.076	0.76	0.001	0.01	0.002	0.02	0.098	0.98	0.025	0.25
						6	0.043	0.43	2.13	21.3	0.022	0.22	0.134	1.34	0.007	0.07	0.126	1.26	0.004	0.04	0.085	0.85	0.003	0.03	0.008	0.08	0.06	0.6	0.016	0.16
SC1900003	IPK_CAN_18	na	Hemp	Germany	2	1	0.421	4.21	1.215	12.15	0.019	0.19	0.049	0.49	0.007	0.07	0.149	1.49	0.002	0.02	Not quantified		Not detected		Not detected		Not detected		0.002	0.02
						2	0.064	0.64	0.302	3.02	0.002	0.02	0.007	0.07	0.001	0.01	0.047	0.47	Not detected		Not detected		Not detected		Not detected		Not detected		Not detected
SC1900004	IPK_CAN_19	na	Drug	Italy	5	1	0.062	0.62	1.549	15.49	0.076	0.76	0.971	9.71	0.038	0.38	0.087	0.87	Not detected		Not detected		Not detected		Not detected		0.001	0.01	0.01	0.1
						2	0.107	1.07	2.627	26.27	0.159	1.59	1.695	16.95	0.033	0.33	0.13	1.3	0.002	0.02	Not quantified		Not detected		Not detected		0.047	0.47	0.039	0.39
						3	0.102	1.02	2.728	27.28	0.025	0.25	0.141	1.41	0.021	0.21	0.233	2.33	0.001	0.01	0.002	0.02	Not detected		Not detected		0.002	0.02	0.02	0.2
						4	0.057	0.57	0.993	9.93	0.013	0.13	0.086	0.86	0.01	0.1	0.106	1.06	Not detected		0.001	0.01	Not detected		Not detected		0.016	0.16	0.011	0.11
						5	0.093	0.93	2.26	22.6	0.159	1.59	1.64	16.4	0.03	0.3	0.128	1.28	Not detected		Not detected		Not detected		Not detected		0.001	0.01	0.013	0.13
SC1900006	IPK_CAN_21	na	Drug	Romania	4	1	0.263	2.63	4.811	48.11	0.037	0.37	0.196	1.96	0.025	0.25	0.189	1.89	0.003	0.03	0.023	0.23	0.023	0.23	0.002	0.02	0.09	0.9	0.003	0.03
						2	0.013	0.13	0.027	0.27	0.174	1.74	1.769	17.69	0.011	0.11	0.094	0.94	0.003	0.03	0.008	0.08	0.151	1.51	1.736	17.36	0.151	1.51	0.013	0.13
						3	0.101	1.01	2.281	22.81	0.018	0.18	0.077	0.77	0.002	0.02	0.032	0.32	0.002	0.02	0.039	0.39	Not detected		Not detected		0.045	0.45	0.01	0.1
						4	0.066	0.66	1.877	18.77	0.105	1.05	0.717	7.17	0.012	0.12	0.098	0.98	0.003	0.03	0.022	0.22	0.078	0.78	0.632	6.32	0.011	0.11	0.006	0.06
SC1900007	IPK_CAN_22	Spontanea Serebr.	Hemp	Georgia	1	1	0.095	0.95	1.49	14.9	0.031	0.31	0.213	2.13	0.003	0.03	0.034	0.34	0.003	0.03	0.017	0.17	0.002	0.02	0.01	0.1	0.014	0.14	0.006	0.06
SC1900008	IPK_CAN_23	na	Drug	North Korea	1	1	0.001	0.01	0.007	0.07	0.062	0.62	0.698	6.98	0.001	0.01	0.047	0.47	0.002	0.02	0.001	0.01	Not detected		0.006	0.06	0.001	0.01	0.006	0.06
SC1900009	IPK_CAN_24	na	Drug	Italy	8	1	0.022	0.22	0.515	5.15	0.096	0.96	1.287	12.87	0.009	0.09	0.029	0.29	0.001	0.01	0.007	0.07	0.001	0.01	0.021	0.21	0.04	0.4	0.009	0.09
						2	0.042	0.42	1.495	14.95	0.101	1.01	1.74	17.4	0.009	0.09	0.032	0.32	0.003	0.03	0.026	0.26	0.004	0.04	0.052	0.52	0.099	0.99	0.014	0.14
						3	0.039	0.39	2.684	26.84	0.165	1.65	3.837	38.37	0.003	0.03	0.099	0.99	0.003	0.03	0.024	0.24	0.002	0.02	0.07	0.7	0.131	1.31	0.021	0.21
						4	0.123	1.23	4.046	40.46	0.054	0.54	0.25	2.5	0.009	0.09	0.075	0.75	0.003	0.03	0.024	0.24	0.008	0.08	Not quantified		0.067	0.67	Not quantified
						5	0.045	0.45	2.423	24.23	0.186	1.86	3.487	34.87	0.016	0.16	0.048	0.48	0.005	0.05	0.016	0.16	0.001	0.01	0.041	0.41	0.191	1.91	0.021	0.21
						6	0.127	1.27	7.634	76.34	0.042	0.42	0.383	3.83	0.037	0.37	0.542	5.42	0.006	0.06	0.065	0.65	Not detected		Not detected		0.094	0.94	0.057	0.57
						7	0.067	0.67	2.558	25.58	0.13	1.3	1.893	18.93	0.016	0.16	0.091	0.91	0.005	0.05	0.024	0.24	Not quantified		0.037	0.37	0.017	0.17	0.008	0.08
						8	0.1	1	2.262	22.62	0.179	1.79	1.478	14.78	0.008	0.08	0.095	0.95	0.001	0.01	0	0	Not detected		Not detected		0.071	0.71	0.035	0.35
SC1900012	IPK_CAN_28	na	Drug	na	6	1	0.094	0.94	1.304	13.04	0.017	0.17	0.053	0.53	0.005	0.05	0.074	0.74	0.005	0.05	0.047	0.47	Not detected		Not detected		0.064	0.64	0.01	0.1
						2	0.054	0.54	2.032	20.32	0.01	0.1	0.076	0.76	0.015	0.15	0.061	0.61	0.004	0.04	0.071	0.71	Not detected		0.002	0.02	0.065	0.65	0.007	0.07
						3	0.063	0.63	1.259	12.59	0.198	1.98	1.227	12.27	0.007	0.07	0.152	1.52	0.005	0.05	0.062	0.62	0.015	0.15	0.115	1.15	0.067	0.67	0.015	0.15
						4	0.047	0.47	1.632	16.32	0.16	1.6	1.852	18.52	0.006	0.06	0.136	1.36	0.004	0.04	0.065	0.65	0.005	0.05	0.149	1.49	0.074	0.74	0.013	0.13
						5	0.051	0.51	1.455	14.55	0.017	0.17	0.054	0.54	0.006	0.06	0.06	0.6	0.005	0.05	0.004	0.04	Not detected		0.008	0.08	0.075	0.75	0.009	0.09
						6	0.059	0.59	1.371	13.71	0.036	0.36	0.351	3.51	0.009	0.09	0.069	0.69	0.004	0.04	0.06	0.6	0.004	0.04	0.026	0.26	0.016	0.16	0.004	0.04
SC1900013	IPK_CAN_29	na	Drug	Romania	6	1	0.07	0.7	1.146	11.46	0.25	2.5	1.397	13.97	0.013	0.13	0.029	0.29	0.003	0.03	0.024	0.24	0.009	0.09	0.066	0.66	0.114	1.14	0.008	0.08
						2	0.09	0.9	2.045	20.45	0.263	2.63	2.285	22.85	0.004	0.04	0.08	0.8	0.005	0.05	0.084	0.84	0.019	0.19	0.206	2.06	0.281	2.81	0.008	0.08
						3	0.078	0.78	1.595	15.95	0.263	2.63	1.725	17.25	0.007	0.07	0.046	0.46	0.005	0.05	0.047	0.47	0.012	0.12	0.116	1.16	0.178	1.78	0.026	0.26
						4	0.078	0.78	1.855	18.55	0.184	1.84	1.797	17.97	0.002	0.02	0.055	0.55	0.005	0.05	0.102	1.02	0.016	0.16	0.21	2.1	0.184	1.84	0.007	0.07
						5	0.148	1.48	3.899	38.99	0.041	0.41	0.205	2.05	0.009	0.09	0.093	0.93	0.004	0.04	0.044	0.44	Not detected		0.005	0.05	0.168	1.68	0.015	0.15
						6	0.054	0.54	1.443	14.43	0.142	1.42	1.039	10.39	0.008	0.08	0.053	0.53	0.004	0.04	0.047	0.47	0.01	0.1	0.091	0.91	0.008	0.08	0.004	0.04
SC1900015	IPK_CAN_31	Bernburger	Hemp	Romania	3	1	0.115	1.15	2.874	28.74	0.034	0.34	0.098	0.98	0.009	0.09	0.159	1.59	0.006	0.06	0.138	1.38	Not detected		Not detected		0.06	0.6	0.012	0.12
						2	0.052	0.52	1.52	15.2	0.011	0.11	0.049	0.49	0.001	0.01	0.048	0.48	Not quantified		0.016	0.16	Not detected		Not detected		0.03	0.3	0.004	0.04
						3	0.081	0.81	2.314	23.14	0.027	0.27	0.084	0.84	0.014	0.14	0.122	1.22	0.004	0.04	0.086	0.86	Not detected		0.005	0.05	0.016	0.16	0	0
SC1900016	IPK_CAN_32	na	Hemp	Romania	5	1	0.108	1.08	3.061	30.61	0.018	0.18	0.099	0.99	0.002	0.02	0.053	0.53	0.003	0.03	0.076	0.76	Not detected		Not detected		0.019	0.19	0.009	0.09
						2	0.098	0.98	2.189	21.89	0.021	0.21	0.07	0.7	0.005	0.05	0.108	1.08	0.008	0.08	0.202	2.02	Not detected		0.003	0.03	0.076	0.76	0.014	0.14
						3	0.167	1.67	4.711	47.11	0.027	0.27	0.159	1.59	0.01	0.1	0.113	1.13	0.005	0.05	0.113	1.13	Not detected		Not detected		0.13	1.3	0.023	0.23
						4	0.123	1.23	2.913	29.13	0.019	0.19	0.111	1.11	0.007	0.07	0.072	0.72	0.006	0.06	0.155	1.55	Not detected		0.003	0.03	0.029	0.29	0.009	0.09
						5	0.091	0.91	0.753	7.53	0.021	0.21	0.104	1.04	0.011	0.11	0.099	0.99	0.005	0.05	0.138	1.38	Not detected		0.007	0.07	0.011	0.11	0.005	0.05
SC1900017	IPK_CAN_33	na	Hemp	Romania	4	1	0.323	3.23	4.868	48.68	0.045	0.45	0.168	1.68	0.022	0.22	0.286	2.86	0.003	0.03	0.043	0.43	Not detected		Not detected		0.099	0.99	0.014	0.14
						2	0.088	0.88	1.883	18.83	0.015	0.15	0.06	0.6	0.004	0.04	0.073	0.73	0.005	0.05	0.123	1.23	Not detected		0.001	0.01	0.023	0.23	0.007	0.07
						3	0.092	0.92	2.505	25.05	0.019	0.19	0.099	0.99	0.002	0.02	0.046	0.46	0.002	0.02	0.041	0.41	Not detected		Not detected		0.052	0.52	0.012	0.12
						4	0.088	0.88	2.245	22.45	0.023	0.23	0.089	0.89	0.011	0.11	0.105	1.05	0.006	0.06	0.068	0.68	0.005	0.05	0.005	0.05	0.014	0.14	0.002	0.02
SC1900018	IPK_CAN_34	na	Hemp	Romania	3	1	0.087	0.87	2.893	28.93	0.016	0.16	0.112	1.12	0.008	0.08	0.074	0.74	0.006	0.06	0.223	2.23	Not detected		0.006	0.06	0.027	0.27	0.011	0.11
						2	0.065	0.65	1.805	18.05	0.009	0.09	0.058	0.58	0.005	0.05	0.049	0.49	0.008	0.08	0.333	3.33	Not detected		0.009	0.09	0.031	0.31	0.008	0.08
						3	0.093	0.93	3.392	33.92	0.018	0.18	0.138	1.38	0.014	0.14	0.102	1.02	0.006	0.06	0.281	2.81	Not quantified		0.014	0.14	0.019	0.19	0.005	0.05
SC1900019	IPK_CAN_35	na	Hemp	Romania	1	1	0.15	1.5	3.831	38.31	0.021	0.21	0.106	1.06	0.007	0.07	0.12	1.2	0.003	0.03	0.059	0.59	Not detected		Not detected		0.051	0.51	0.009	0.09
SC1900021	IPK_CAN_37	na	Drug	France	7	1	0.003	0.03	0.012	0.12	0.128	1.28	4.4	44	0.012	0.12	0.207	2.07	0.002	0.02	0.004	0.04	Not quantified		0.054	0.54	0.021	0.21	0.004	0.04
						2	0.002	0.02	0.011	0.11	0.114	1.14	3.843	38.43	0.017	0.17	0.236	2.36	0.007	0.07	0.011	0.11	0.001	0.01	0.068	0.68	0.02	0.2	Not detected
						3	Not quantified		0.012	0.12	0.104	1.04	3.513	35.13	0.011	0.11	0.184	1.84	0.005	0.05	0.013	0.13	0.001	0.01	0.059	0.59	0.01	0.1	Not detected
						4	0.001	0.01	0.007	0.07	0.065	0.65	2.679	26.79	0.054	0.54	0.088	0.88	0.006	0.06	0.006	0.06	Not quantified		0.029	0.29	0.009	0.09	Not detected
						5	Not quantified		0.01	0.1	0.062	0.62	3.067	30.67	0.009	0.09	0.132	1.32	0.005	0.05	0.012	0.12	Not quantified		0.028	0.28	0.002	0.02	Not detected
						6	0.002	0.02	0.01	0.1	0.146	1.46	4.988	49.88	0.013	0.13	0.277	2.77	0.009	0.09	0.015	0.15	0.003	0.03	0.075	0.75	0.015	0.15	Not detected
						7	Not detected		Not detected		0.068	0.68	2.516	25.16	0.016	0.16	0.112	1.12	Not detected		Not detected		Not quantified		0.029	0.29	Not quantified		Not detected
SC1900022	IPK_CAN_38	na	Hemp	Romania	8	1	0.126	1.26	0.947	9.47	0.016	0.16	0.032	0.32	0.005	0.05	0.016	0.16	0.004	0.04	0.021	0.21	Not detected		0.001	0.01	0.061	0.61	0.015	0.15
						2	0.002	0.02	0.032	0.32	0.005	0.05	0.006	0.06	0	0	0.003	0.03	Not detected		0.002	0.02	Not detected		Not detected		0.021	0.21	0.008	0.08
						3	0.002	0.02	0.035	0.35	0.005	0.05	0.006	0.06	0	0	0.004	0.04	Not detected		0.002	0.02	Not detected		Not detected		0.015	0.15	0.008	0.08
						4	0.07	0.7	2.196	21.96	0.018	0.18	0.064	0.64	0.007	0.07	0.101	1.01	0.007	0.07	0.107	1.07	Not quantified		0.008	0.08	0.051	0.51	0.006	0.06
						5	0.032	0.32	0.757	7.57	0.01	0.1	0.032	0.32	0.006	0.06	0.034	0.34	0.004	0.04	0.011	0.11	0.023	0.23	Not quantified		0.007	0.07	0.004	0.04
						6	0.039	0.39	1.408	14.08	0.012	0.12	0.049	0.49	0.003	0.03	0.045	0.45	0.003	0.03	0.129	1.29	Not detected		0.003	0.03	0.035	0.35	0.003	0.03
						7	0.069	0.69	2.239	22.39	0.019	0.19	0.087	0.87	0.005	0.05	0.076	0.76	0.007	0.07	0.206	2.06	Not quantified		0.013	0.13	0.06	0.6	0.001	0.01
						8	0.065	0.65	1.51	15.1	0.01	0.1	0.052	0.52	0.006	0.06	0.102	1.02	Not quantified		0.086	0.86	Not detected		0.001	0.01	0.008	0.08	Not detected
SC1900023	IPK_CAN_39	na	Drug	China	4	1	0.003	0.03	0.003	0.03	0.049	0.49	1.18	11.8	0.008	0.08	0.035	0.35	0.001	0.01	0.001	0.01	0.027	0.27	1.276	12.76	0.041	0.41	0.018	0.18
						2	0.003	0.03	0.014	0.14	0.058	0.58	1.873	18.73	0.009	0.09	0.077	0.77	0.001	0.01	0.001	0.01	0.027	0.27	1.368	13.68	0.049	0.49	0.025	0.25
						3	0.002	0.02	0.005	0.05	0.052	0.52	1.46	14.6	0.011	0.11	0.066	0.66	0.002	0.02	0.004	0.04	0.033	0.33	1.745	17.45	0.067	0.67	0.048	0.48
						4	0.002	0.02	0.006	0.06	0.027	0.27	1.31	13.1	0.007	0.07	0.055	0.55	Not detected		Not detected		0.023	0.23	1.278	12.78	0.007	0.07	0.007	0.07
SC1900024	IPK_CAN_40	na	Drug	Italy	3	1	0.006	0.06	0.181	1.81	0.153	1.53	1.04	10.4	0	0	0.042	0.42	Not detected		Not detected		Not detected		0.005	0.05	0.024	0.24	0.002	0.02
						2	0.183	1.83	3.469	34.69	0.03	0.3	0.155	1.55	0.026	0.26	0.537	5.37	0.004	0.04	0.02	0.2	Not detected		Not detected		0.214	2.14	0.007	0.07
						3	0.057	0.57	1.521	15.21	0.058	0.58	0.447	4.47	0.012	0.12	0.206	2.06	Not detected		0.006	0.06	Not detected		Not detected		0.017	0.17	Not detected
SC1900026	IPK_CAN_42	na	Drug	Croatia	5	1	0.078	0.78	0.79	7.9	0.12	1.2	0.611	6.11	0.009	0.09	0.056	0.56	Not detected		Not detected		0.01	0.1	0.012	0.12	0.02	0.2	0.016	0.16
						2	0.069	0.69	1.59	15.9	0.129	1.29	0.883	8.83	0.007	0.07	0.113	1.13	0.002	0.02	0.002	0.02	Not detected		0.005	0.05	0.118	1.18	0.002	0.02
						3	0.046	0.46	1.337	13.37	0.126	1.26	1.407	14.07	0.005	0.05	0.094	0.94	0.003	0.03	0.006	0.06	Not detected		0.009	0.09	0.109	1.09	0.012	0.12
						4	0.075	0.75	1.544	15.44	0.115	1.15	0.465	4.65	0.02	0.2	0.102	1.02	0.008	0.08	0.01	0.1	Not detected		0.012	0.12	0.016	0.16	0.01	0.1
						5	0.033	0.33	1.602	16.02	0.101	1.01	0.87	8.7	0.011	0.11	0.103	1.03	0.002	0.02	0.002	0.02	Not detected		Not detected		0.007	0.07	0.001	0.01
SC1900027	IPK_CAN_43	Hobenthurmer Gleichzeitig Reifender	Hemp	Germany	3	1	0.068	0.68	1.984	19.84	0.01	0.1	0.079	0.79	0.007	0.07	0.098	0.98	0.004	0.04	0.138	1.38	Not detected		0.005	0.05	0.018	0.18	Not detected
						2	0.082	0.82	2.015	20.15	0.015	0.15	0.079	0.79	0.009	0.09	0.085	0.85	0.007	0.07	0.135	1.35	Not quantified		0.008	0.08	0.007	0.07	0.005	0.05
						3	0.102	1.02	2.629	26.29	0.019	0.19	0.093	0.93	0.008	0.08	0.063	0.63	0.006	0.06	0.131	1.31	Not detected		0.005	0.05	0.083	0.83	0.002	0.02
SC1900029	IPK_CAN_45	Krasnodarskaya	Drug	na	3	1	0.015	0.15	0.871	8.71	0.034	0.34	0.894	8.94	0.001	0.01	0.017	0.17	0.001	0.01	Not quantified		Not detected		0.01	0.1	0.022	0.22	0.001	0.01
						2	0.047	0.47	2.688	26.88	0.018	0.18	0.171	1.71	0.003	0.03	0.067	0.67	Not quantified		0.031	0.31	Not quantified		Not detected		0.058	0.58	0.005	0.05
						3	0.028	0.28	1.865	18.65	0.03	0.3	0.554	5.54	0.006	0.06	0.062	0.62	Not quantified		0.017	0.17	Not quantified		0.007	0.07	0.008	0.08	Not detected
SC1900030	IPK_CAN_46	Fibrimon 56	Hemp/Fibre	na	4	1	0.224	2.24	3.876	38.76	0.032	0.32	0.117	1.17	0.03	0.3	0.344	3.44	0.005	0.05	0.018	0.18	Not detected		Not detected		0.066	0.66	0.013	0.13
						2	0.08	0.8	2.197	21.97	0.01	0.1	0.071	0.71	0.002	0.02	0.04	0.4	0.001	0.01	0.04	0.4	Not detected		Not detected		0.022	0.22	0.006	0.06
						3	0.202	2.02	5.174	51.74	0.039	0.39	0.194	1.94	0.011	0.11	0.239	2.39	0.026	0.26	0.738	7.38	Not quantified		0.03	0.3	0.068	0.68	0.024	0.24
						4	0.111	1.11	2.963	29.63	0.024	0.24	0.108	1.08	0.018	0.18	0.175	1.75	0.005	0.05	0.161	1.61	Not detected		0.007	0.07	0.04	0.4	0.007	0.07
SC1900031	IPK_CAN_47	na	Hemp	Turkey	1	1	0.126	1.26	1.316	13.16	0.018	0.18	0.043	0.43	0.004	0.04	0.024	0.24	0.016	0.16	0.033	0.33	Not detected		0.001	0.01	0.007	0.07	0.004	0.04
SC1900032	IPK_CAN_48	Eletta campana	Drug	na	3	1	0.058	0.58	2.365	23.65	0.097	0.97	2.034	20.34	0.01	0.1	0.216	2.16	Not detected		Not detected		Not detected		0.001	0.01	0.058	0.58	0.014	0.14
						2	0.028	0.28	2.067	20.67	0.069	0.69	2.097	20.97	0.012	0.12	0.131	1.31	Not detected		0.014	0.14	Not quantified		0.033	0.33	0.025	0.25	0.004	0.04
						3	0.059	0.59	2.362	23.62	0.095	0.95	2.032	20.32	0.011	0.11	0.208	2.08	Not detected		Not detected		Not detected		0.001	0.01	0.053	0.53	0.015	0.15
SC1900033	IPK_CAN_49	Superfibra	Hemp/Fibre	na	6	1	0.053	0.53	2.407	24.07	0.101	1.01	1.958	19.58	0.01	0.1	0.069	0.69	0.002	0.02	0.002	0.02	Not detected		0.003	0.03	0.087	0.87	0.022	0.22
						2	0.099	0.99	4.669	46.69	0.029	0.29	0.199	1.99	0.006	0.06	0.25	2.5	0.001	0.01	0.007	0.07	Not detected		Not detected		0.272	2.72	0.024	0.24
						3	0.055	0.55	1.992	19.92	0.145	1.45	2.69	26.9	0.014	0.14	0.034	0.34	0.001	0.01	0.023	0.23	0.001	0.01	0.069	0.69	0.143	1.43	0.021	0.21
						4	0.01	0.1	0.47	4.7	0.149	1.49	3.564	35.64	0.003	0.03	0.057	0.57	Not detected		Not detected		Not quantified		0.049	0.49	0.281	2.81	0.013	0.13
						5	0.07	0.7	3.234	32.34	0.028	0.28	0.399	3.99	0.014	0.14	0.13	1.3	Not detected		Not detected		Not detected		Not detected		0.176	1.76	0.017	0.17
						6	0.066	0.66	3.145	31.45	0.071	0.71	1.729	17.29	0.019	0.19	0.175	1.75	0.004	0.04	0.009	0.09	Not quantified		0.021	0.21	0.029	0.29	0.007	0.07
SC1900034	IPK_CAN_50	Fibrimon	Hemp/Fibre	na	6	1	0.041	0.41	1.637	16.37	0.009	0.09	0.061	0.61	0.004	0.04	0.075	0.75	0.002	0.02	0.034	0.34	Not detected		Not detected		0.008	0.08	Not detected
						2	0.041	0.41	1.64	16.4	0.009	0.09	0.06	0.6	0.004	0.04	0.071	0.71	0.002	0.02	0.034	0.34	0.001	0.01	0.002	0.02	0.018	0.18	Not detected
						3	0.015	0.15	0.435	4.35	0.004	0.04	0.015	0.15	0.003	0.03	0.017	0.17	Not detected		0.008	0.08	Not detected		Not detected		0.02	0.2	0.001	0.01
						4	0.084	0.84	1.534	15.34	0.017	0.17	0.07	0.7	0.006	0.06	0.03	0.3	0.005	0.05	0.029	0.29	Not detected		0.005	0.05	0.022	0.22	0.007	0.07
						5	0.064	0.64	1.155	11.55	0.015	0.15	0.06	0.6	0.005	0.05	0.021	0.21	0.005	0.05	0.022	0.22	0.002	0.02	0.004	0.04	0.014	0.14	0.006	0.06
						6	0.028	0.28	2.225	22.25	0.067	0.67	2.39	23.9	0.014	0.14	0.14	1.4	Not detected		0.01	0.1	Not quantified		0.034	0.34	0.021	0.21	0.005	0.05
SC1900036	IPK_CAN_52	Fibridia	Hemp/Fibre	na	5	1	0.248	2.48	5.149	51.49	0.043	0.43	0.192	1.92	0.024	0.24	0.742	7.42	0.003	0.03	0.036	0.36	Not detected		Not detected		0.043	0.43	0.028	0.28
						2	0.42	4.2	1.247	12.47	0.027	0.27	0.04	0.4	0.008	0.08	0.025	0.25	0.007	0.07	0.005	0.05	Not detected		Not detected		0.014	0.14	0.009	0.09
						3	0.123	1.23	3.544	35.44	0.023	0.23	0.126	1.26	0.056	0.56	0.26	2.6	0.001	0.01	0.014	0.14	Not detected		Not detected		0.029	0.29	0.015	0.15
						4	0.034	0.34	0.728	7.28	0.006	0.06	0.03	0.3	0.004	0.04	0.025	0.25	0.001	0.01	0.001	0.01	Not detected		Not detected		0.003	0.03	0.002	0.02
						5	0.077	0.77	3.327	33.27	0.014	0.14	0.129	1.29	0.03	0.3	0.308	3.08	Not detected		0.017	0.17	Not detected		Not detected		0.035	0.35	0.005	0.05
SC1900037	IPK_CAN_53	Fibrimon	Hemp/Fibre	na	6	1	0.014	0.14	0.339	3.39	0.003	0.03	0.016	0.16	0	0	0.007	0.07	0.004	0.04	0.04	0.4	0.002	0.02	0.005	0.05	0.001	0.01	0.001	0.01
						2	0.087	0.87	0.763	7.63	0.014	0.14	0.03	0.3	0.005	0.05	0.017	0.17	0.004	0.04	0.006	0.06	0.008	0.08	0.004	0.04	0.007	0.07	0.008	0.08
						3	0.04	0.4	0.562	5.62	0.012	0.12	0.039	0.39	0.005	0.05	0.014	0.14	0.006	0.06	0.044	0.44	0.002	0.02	0.007	0.07	0.004	0.04	0.004	0.04
						4	0.049	0.49	0.606	6.06	0.01	0.1	0.042	0.42	0.001	0.01	0.014	0.14	0.002	0.02	0.03	0.3	Not detected		0.003	0.03	0.18	1.8	0.004	0.04
						5	0.042	0.42	0.558	5.58	0.011	0.11	0.039	0.39	0.005	0.05	0.014	0.14	0.005	0.05	0.036	0.36	0.002	0.02	0.006	0.06	0.005	0.05	0.005	0.05
						6	0.039	0.39	0.455	4.55	0.01	0.1	0.024	0.24	0.005	0.05	0.01	0.1	0.004	0.04	0.019	0.19	Not detected		0.004	0.04	0.004	0.04	Not detected
SC1900038	IPK_CAN_54	Fibrimon 21	Hemp/Fibre	na	2	1	0.012	0.12	0.398	3.98	0.004	0.04	0.017	0.17	0	0	0.005	0.05	0.001	0.01	0.017	0.17	Not detected		0.002	0.02	0.008	0.08	0.001	0.01
						2	0.055	0.55	0.955	9.55	0.007	0.07	0.037	0.37	0.004	0.04	0.022	0.22	0.002	0.02	0.037	0.37	Not detected		Not detected		0.02	0.2	Not detected
SC1900042	IPK_CAN_58	Kongo Hanf	Drug	Spain	7	1	0.002	0.02	0.002	0.02	0.108	1.08	1.67	16.7	0.004	0.04	0.143	1.43	Not detected		Not detected		0.003	0.03	0.065	0.65	0.077	0.77	0.016	0.16
						2	0.006	0.06	0	0	0.243	2.43	4.299	42.99	0.01	0.1	0.325	3.25	Not detected		Not detected		0.005	0.05	0.181	1.81	0.064	0.64	0.029	0.29
						3	0.003	0.03	0.003	0.03	0.102	1.02	2.186	21.86	0	0	0.158	1.58	0.001	0.01	0.001	0.01	0.002	0.02	0.108	1.08	0.026	0.26	0.019	0.19
						4	0.001	0.01	0.002	0.02	0.225	2.25	1.961	19.61	0.005	0.05	0.087	0.87	Not detected		Not detected		0.01	0.1	0.096	0.96	0.056	0.56	0.015	0.15
						5	0.003	0.03	0.012	0.12	0.312	3.12	2.758	27.58	0.014	0.14	0.436	4.36	Not detected		Not detected		0.015	0.15	0.18	1.8	0.041	0.41	0.019	0.19
						6	0.006	0.06	0.013	0.13	0.239	2.39	4.62	46.2	0.013	0.13	0.479	4.79	Not detected		Not detected		0.009	0.09	0.267	2.67	0.081	0.81	0.022	0.22
						7	0.003	0.03	0.017	0.17	0.581	5.81	4.453	44.53	0	0	0.334	3.34	Not detected		Not detected		0.008	0.08	0.202	2.02	0.033	0.33	0.015	0.15
SC1900043	IPK_CAN_59	Türken P 494	Drug	na	3	1	0.115	1.15	4.37	43.7	0.026	0.26	0.175	1.75	0.01	0.1	0.249	2.49	0.003	0.03	0.126	1.26	Not detected		Not detected		0.007	0.07	0.028	0.28
						2	0.019	0.19	0.796	7.96	0.042	0.42	0.958	9.58	0.003	0.03	0.053	0.53	Not quantified		0.009	0.09	0.001	0.01	0.143	1.43	0.008	0.08	0.015	0.15
						3	0.037	0.37	2.097	20.97	0.022	0.22	0.575	5.75	0.01	0.1	0.149	1.49	0.005	0.05	0.061	0.61	0.005	0.05	0.083	0.83	0.016	0.16	0.009	0.09
SC1900045	IPK_CAN_61	Carmagnola	Hemp high CBD	na	2	1	0.058	0.58	2.283	22.83	0.023	0.23	0.087	0.87	0.005	0.05	0.123	1.23	Not detected		0.004	0.04	Not detected		Not detected		0.051	0.51	0.005	0.05
						2	0.044	0.44	1.883	18.83	0.017	0.17	0.085	0.85	0.009	0.09	0.105	1.05	Not detected		0.01	0.1	Not detected		Not detected		0.013	0.13	0.003	0.03
SC1900046	IPK_CAN_62	Bredemann P	Hemp	na	1	1	0.057	0.57	2.847	28.47	0.01	0.1	0.105	1.05	0.005	0.05	0.091	0.91	Not quantified		0.02	0.2	Not detected		Not detected		0.023	0.23	0.013	0.13
SC1900047	IPK_CAN_63	RAMO	Hemp	Germany	3	1	0.124	1.24	3.275	32.75	0.024	0.24	0.135	1.35	0.008	0.08	0.178	1.78	0.003	0.03	0.069	0.69	Not detected		Not detected		0.053	0.53	0.022	0.22
						2	0.122	1.22	2.166	21.66	0.015	0.15	0.108	1.08	0.007	0.07	0.08	0.8	0.005	0.05	0.058	0.58	Not detected		0.003	0.03	0.009	0.09	Not quantified
						3	0.076	0.76	2.248	22.48	0.009	0.09	0.095	0.95	0.008	0.08	0.119	1.19	0.001	0.01	0.03	0.3	Not detected		Not detected		0.013	0.13	Not quantified
SC1900048	IPK_CAN_64	na	Hemp	Turkey	1	1	0.222	2.22	7.466	74.66	0.02	0.2	0.259	2.59	0.043	0.43	0.197	1.97	0.003	0.03	0.026	0.26	Not detected		Not detected		0.175	1.75	Not quantified
SC1900052	IPK_CAN_68	Kompolti	Hemp high CBD	Germany	1	1	0.093	0.93	3.918	39.18	0.032	0.32	0.16	1.6	0.011	0.11	0.371	3.71	Not quantified		0.029	0.29	Not detected		Not detected		0.047	0.47	0.031	0.31
SC1900054	IPK_CAN_70	Kompolti	Hemp high CBD	Germany	5	1	0.069	0.69	3.382	33.82	0.022	0.22	0.125	1.25	0.004	0.04	0.19	1.9	Not quantified		0.051	0.51	Not detected		Not detected		0.119	1.19	0.02	0.2
						2	0.067	0.67	2.986	29.86	0.022	0.22	0.138	1.38	0.003	0.03	0.154	1.54	0.001	0.01	0.01	0.1	Not detected		Not detected		0.063	0.63	0.049	0.49
						3	0.004	0.04	0.112	1.12	0.139	1.39	2.797	27.97	0.002	0.02	0.069	0.69	0.008	0.08	Not quantified		Not quantified		0.025	0.25	0.103	1.03	0.011	0.11
						4	0.002	0.02	0.124	1.24	0.131	1.31	3.801	38.01	0.006	0.06	0.276	2.76	0.002	0.02	Not quantified		Not quantified		0.012	0.12	0.118	1.18	0.052	0.52
						5	0.043	0.43	2.049	20.49	0.084	0.84	1.62	16.2	0.017	0.17	0.21	2.1	0.004	0.04	0.028	0.28	Not quantified		0.013	0.13	0.03	0.3	0.015	0.15
SC1900055	IPK_CAN_100	Gelb	Hemp	na	1	1	0.006	0.06	0.072	0.72	0.061	0.61	0.506	5.06	0	0	0.006	0.06	0.002	0.02	0.013	0.13	0.004	0.04	0.03	0.3	0.005	0.05	0.002	0.02
SC1900059	IPK_CAN_23	na	Drug	North Korea	3	1	0.004	0.04	0.011	0.11	0.046	0.46	0.852	8.52	0	0	0.032	0.32	0.002	0.02	Not quantified		0.005	0.05	0.006	0.06	0.005	0.05	0.018	0.18
						2	0.012	0.12	0.02	0.2	0.98	9.8	3.849	38.49	0.026	0.26	0.125	1.25	Not detected		Not detected		Not quantified		0.015	0.15	0.233	2.33	0.07	0.7
						3	0.003	0.03	0.016	0.16	1.01	10.1	4.748	47.48	0	0	0.357	3.57	Not detected		Not detected		0.007	0.07	0.213	2.13	0.033	0.33	0.016	0.16
SC1900060	IPK_CAN_57	na	Hemp	Syria	3	1	0.351	3.51	5.732	57.32	0.034	0.34	0.201	2.01	0.027	0.27	0.13	1.3	0.007	0.07	0.04	0.4	Not detected		Not detected		0.054	0.54	0.012	0.12
						2	0.52	5.2	9.757	97.57	0.033	0.33	0.382	3.82	0.042	0.42	0.234	2.34	0.011	0.11	0.076	0.76	Not detected		Not detected		0.067	0.67	0.019	0.19
						3	0.173	1.73	4.366	43.66	0.018	0.18	0.143	1.43	0.016	0.16	0.096	0.96	0.005	0.05	0.024	0.24	Not detected		Not detected		0.01	0.1	0.12	1.2
SC1900062	IPK_CAN_26	na	Hemp	na	6	1	0.146	1.46	5.382	53.82	0.044	0.44	0.192	1.92	0.018	0.18	0.221	2.21	0.006	0.06	0.04	0.4	Not detected		Not detected		0.178	1.78	0.03	0.3
						2	0.192	1.92	2.218	22.18	0.019	0.19	0.068	0.68	0.011	0.11	0.015	0.15	0.002	0.02	0.004	0.04	Not detected		Not detected		0.054	0.54	0.008	0.08
						3	0.101	1.01	3.917	39.17	0.029	0.29	0.151	1.51	0.02	0.2	0.206	2.06	0.005	0.05	0.035	0.35	0.03	0.3	0.004	0.04	0.234	2.34	0.016	0.16
						4	0.138	1.38	7.548	75.48	0.081	0.81	0.301	3.01	0.02	0.2	0.208	2.08	0.007	0.07	0.109	1.09	0.002	0.02	0.007	0.07	0.009	0.09	0.095	0.95
						5	0.159	1.59	7.545	75.45	0.039	0.39	0.304	3.04	0.01	0.1	0.159	1.59	0.002	0.02	0.051	0.51	Not detected		Not detected		0.103	1.03	0.101	1.01
						6	0.085	0.85	2.995	29.95	0.092	0.92	1.216	12.16	0.019	0.19	0.135	1.35	0.005	0.05	0.062	0.62	0.007	0.07	0.087	0.87	0.025	0.25	0.008	0.08
SC1900063	IPK_CAN_20	na	Drug	North Korea	1	1	0.009	0.09	0.143	1.43	0.193	1.93	2.21	22.1	0.041	0.41	0.166	1.66	Not detected		Not detected		Not quantified		0.006	0.06	0.027	0.27	0.044	0.44
SC1900064	IPK_CAN_51	na	Drug	Argentina	6	1	0.059	0.59	1.62	16.2	0.216	2.16	2.898	28.98	0.011	0.11	0.095	0.95	0.009	0.09	0.009	0.09	0.037	0.37	0.026	0.26	0.097	0.97	0.01	0.1
						2	0.094	0.94	2.993	29.93	0.391	3.91	5.358	53.58	0.013	0.13	0.289	2.89	0.006	0.06	0.007	0.07	Not quantified		0.026	0.26	0.184	1.84	0.032	0.32
						3	0.023	0.23	1.004	10.04	0.06	0.6	1.179	11.79	0.005	0.05	0.046	0.46	0.012	0.12	0.351	3.51	0.024	0.24	0.652	6.52	0.097	0.97	0.013	0.13
						4	0.051	0.51	2.32	23.2	0.175	1.75	3.798	37.98	0.01	0.1	0.183	1.83	0.008	0.08	0.007	0.07	0.052	0.52	0.019	0.19	0.021	0.21	0.028	0.28
						5	0.092	0.92	5.204	52.04	0.021	0.21	0.206	2.06	0.015	0.15	0.158	1.58	0.006	0.06	0.031	0.31	0.042	0.42	0.004	0.04	0.022	0.22	0.042	0.42
						6	0.065	0.65	2.226	22.26	0.159	1.59	2.335	23.35	0.018	0.18	0.129	1.29	0.004	0.04	0.093	0.93	0.009	0.09	0.172	1.72	0.029	0.29	0.008	0.08
SC1900065	IPK_CAN_18	na	Drug	Germany	1	1	0.137	1.37	2.617	26.17	0.174	1.74	1.649	16.49	0.006	0.06	0.108	1.08	0.003	0.03	0.027	0.27	0.002	0.02	0.045	0.45	0.007	0.07	Not detected
SC1900066	IPK_CAN_36	na	Drug	na	2	1	0.001	0.01	0.017	0.17	0.581	5.81	10.513	105.13	0.014	0.14	0.328	3.28	0.004	0.04	Not quantified		0.006	0.06	0.187	1.87	0.149	1.49	0.028	0.28
						2	0.006	0.06	0.077	0.77	0.436	4.36	7.446	74.46	0.02	0.2	0.166	1.66	Not detected		Not detected		Not quantified		0.057	0.57	0.276	2.76	0.058	0.58
SC2000001	IPK_CAN_27	na	Drug	na	2	1	0.032	0.32	1.183	11.83	0.072	0.72	1.197	11.97	0.006	0.06	0.096	0.96	0.005	0.05	0.08	0.8	0.008	0.08	0.118	1.18	0.089	0.89	0.018	0.18
						2	0.035	0.35	1.448	14.48	0.015	0.15	0.058	0.58	0.005	0.05	0.089	0.89	0.006	0.06	0.208	2.08	0.004	0.04	0.012	0.12	0.013	0.13	0.007	0.07
SC2000002	IPK_CAN_16	na	Drug	Slovakia	2	1	0.015	0.15	0.528	5.28	0.037	0.37	0.714	7.14	0.004	0.04	0.021	0.21	0.004	0.04	0.04	0.4	0.006	0.06	0.108	1.08	Not detected		Not detected
						2	0.012	0.12	0.519	5.19	0.03	0.3	0.7	7	0.001	0.01	0.018	0.18	Not quantified		0.036	0.36	0.002	0.02	0.103	1.03	Not detected		Not detected
SC2000003	IPK_CAN_41	na	Drug	na	2	1	0.004	0.04	0.013	0.13	0.183	1.83	2.921	29.21	0.01	0.1	0.099	0.99	Not detected		Not detected		Not quantified		0.022	0.22	0.025	0.25	0.023	0.23
						2	0.006	0.06	0.017	0.17	0.436	4.36	4.348	43.48	0.008	0.08	0.115	1.15	Not detected		Not detected		Not quantified		0.024	0.24	0.114	1.14	0.066	0.66
				Sum	249	Mean	0.0612208	0.612208	1.44584	14.4584	0.0876867	0.876867	1.0054	10.054	0.0103421	0.103421	0.108643	1.08643	0.00536471	0.0536471	0.0523214	0.523214	0.0149739	0.149739	0.0998429	0.998429	0.0537966	0.537966	0.0138899	0.138899
						Median	0.0415	0.415	1.004	10.04	0.038	0.38	0.304	3.04	0.007	0.07	0.0795	0.795	0.004	0.04	0.023	0.23	0.005	0.05	0.019	0.19	0.029	0.29	0.009	0.09
						SD	0.0773446	0.773446	1.66292	16.6292	0.124417	1.24417	1.42096	14.2096	0.0107686	0.107686	0.113949	1.13949	0.010745	0.10745	0.0920357	0.920357	0.0305658	0.305658	0.262863	2.62863	0.0739856	0.739856	0.0163384	0.163384

## Sheet: Table S2
Table S2: Summary statistics of the cannabinoid content in % (w/w) for the full sample set quantified using HPLC. The Table summarises the number of individuals with a cannabinoid concentration above 0.01 % (w/w) (n), the mean, median, minimum (min) and maximum (max) concentration and the standard deviation (SD). Cannabinoid content results are based on dry weight material on harvested female inf…
Cannabinoid	Summary Statistics
	n	Mean % (w/w)	Median % (w/w)	SD	Min % (w/w)	Max % (w/w)
CBD	239	0.061	0.042	0.077	0	0.52
CBDA	245	1.434	0.993	1.661	0	9.76
Δ9-THC	249	0.088	0.038	0.124	0.001	1.85
Δ9-THCA	249	1.005	0.304	1.421	0.002	10.51
CBG	219	0.01	0.007	0.011	0	0.08
CBGA	245	0.109	0.08	0.114	0	0.74
THCV	116	0.015	0.005	0.031	0	0.26
THCVA	192	0.1	0.019	0.263	0	1.75
CBDV	171	0.005	0.004	0.011	0	0.13
CBDVA	187	0.052	0.023	0.092	0	0.74
CBC	216	0.014	0.009	0.016	0	0.12
CBN	236	0.054	0.029	0.074	0	0.76

## Sheet: Table S3
Table S3: Hierarchical clustering raw data. Lists the seed accession ID, cannabinoid HPLC % (w/w) results in two decimal places, clusters and observations. Samples denoted as ECO originate from the Ecofibre global germplasm collection and samples with the accession ID of SC originate from the IPK germplasm collection. *Type is determined based on final Δ9-THC % (w/w) content from the HPLC-UV anal…
			Cannabinoids %(w/w)
SCU ID	Type*	Country**	CBGA	CBG	CBD	CBDA	CBC	Δ9-THC	Δ9-THCA	CBN	CBDVA	CBDV	THCV	THCVA	Cluster	Characteristics
SC1900006-2	Drug	Romania	0.09	0.01	0.01	0.03	0.01	0.17	1.77	0.15	0.01	0	0.15	1.74	1	Intermediate to high in THCVA and/or intermediate in THC(A), mostly from China
SC1900023-3	Drug	China	0.08	0.01	0	0.01	0.02	0.06	1.87	0.05	0	0	0.03	1.37	1	Intermediate to high in THCVA and/or intermediate in THC(A), mostly from China
SC1900023-1	Drug	China	0.04	0.01	0	0	0.02	0.05	1.18	0.04	0	0	0.03	1.28	1	Intermediate to high in THCVA and/or intermediate in THC(A), mostly from China
SC1900023-2	Drug	China	0.07	0.01	0	0	0.05	0.05	1.46	0.07	0	0	0.03	1.74	1	Intermediate to high in THCVA and/or intermediate in THC(A), mostly from China
SC1900023-4	Drug	China	0.06	0.01	0	0.01	0.01	0.03	1.31	0.01	0	0	0.02	1.28	1	Intermediate to high in THCVA and/or intermediate in THC(A), mostly from China
ECO-014-1	Hemp	China	0.03	0	0	0.04	0.01	0.06	0.51	0.03	0	0	0.09	1.01	1	Intermediate to high in THCVA and/or intermediate in THC(A), mostly from China
ECO-014-2	Hemp	China	0.01	0	0	0	0.02	0.02	0.3	0	0	0	0.02	0.57	1	Intermediate to high in THCVA and/or intermediate in THC(A), mostly from China
ECO-014-3	Hemp	China	0.02	0.01	0	0	0.02	0.03	0.39	0.03	0	0	0.03	0.51	1	Intermediate to high in THCVA and/or intermediate in THC(A), mostly from China
ECO-021-1	Hemp	China	0.02	0	0	0	0.01	0.03	0.23	0.09	0	0	0.06	0.76	1	Intermediate to high in THCVA and/or intermediate in THC(A), mostly from China
SC1900006-4	Drug	Romania	0.1	0.01	0.07	1.88	0.01	0.11	0.72	0.01	0.02	0	0.08	0.63	1	Intermediate to high in THCVA and/or intermediate in THC(A), mostly from China
ECO-025-1	Hemp	Canada	0.06	0	0	0	0	0.22	0.11	0	0	0	0.022	0.01	1	Intermediate to high in THCVA and/or intermediate in THC(A), mostly from China
ECO-025-3	Hemp	Canada	0.04	0	0	0	0	0.25	0.3	0	0	0.01	0.08	0.01	1	Intermediate to high in THCVA and/or intermediate in THC(A), mostly from China
ECO-025-2	Hemp	Canada	0.08	0	0	0	0	0.23	0.26	0	0	0	0.06	0	1	Intermediate to high in THCVA and/or intermediate in THC(A), mostly from China
ECO-012-3	Hemp	China	0.03	0	0.02	0.43	0	0.04	0.26	0.03	0.23	0.01	0.03	0.22	1	Intermediate to high in THCVA and/or intermediate in THC(A), mostly from China
SC1900064-3	Drug	Argentina	0.05	0.01	0.02	1	0.01	0.06	1.18	0.1	0.35	0.01	0.02	0.65	1	Intermediate to high in THCVA and/or intermediate in THC(A), mostly from China
SC1900013-4	Drug	Romania	0.06	0	0.08	1.86	0.01	0.18	1.8	0.18	0.1	0.01	0.02	0.21	2	Intermediate in THCA and CBGA, some with CBDA
SC1900013-2	Drug	Romania	0.08	0	0.09	2.04	0.01	0.26	2.28	0.28	0.08	0	0.02	0.21	2	Intermediate in THCA and CBGA, some with CBDA
SC1900009-3	Drug	Italy	0.1	0	0.04	2.68	0.02	0.17	3.84	0.13	0.02	0	0	0.07	2	Intermediate in THCA and CBGA, some with CBDA
SC1900009-5	Drug	Italy	0.05	0.02	0.05	2.42	0.02	0.19	3.49	0.19	0.02	0	0	0.04	2	Intermediate in THCA and CBGA, some with CBDA
SC1900033-2	Hemp/Fibre	na	0.25	0.01	0.1	4.67	0.02	0.03	0.2	0.27	0.01	0	0	0	2	Intermediate in THCA and CBGA, some with CBDA
SC1900033-1	Hemp/Fibre	na	0.07	0.01	0.05	2.41	0.02	0.1	1.96	0.09	0	0	0	0	2	Intermediate in THCA and CBGA, some with CBDA
SC1900009-8	Drug	Italy	0.1	0.01	0.1	2.26	0.03	0.18	1.48	0.07	0	0	0	0	2	Intermediate in THCA and CBGA, some with CBDA
SC1900013-3	Drug	Romania	0.05	0.01	0.08	1.59	0.03	0.26	1.73	0.18	0.05	0	0.01	0.12	2	Intermediate in THCA and CBGA, some with CBDA
SC1900013-1	Drug	Romania	0.03	0.01	0.07	1.15	0.01	0.25	1.4	0.11	0.02	0	0.01	0.07	2	Intermediate in THCA and CBGA, some with CBDA
SC1900064-1	Drug	Argentina	0.1	0.01	0.06	1.62	0.01	0.22	2.9	0.1	0.01	0.01	0.04	0.03	2	Intermediate in THCA and CBGA, some with CBDA
SC1900064-4	Drug	Argentina	0.18	0.01	0.05	2.32	0.03	0.17	3.8	0.02	0.01	0.01	0.05	0.02	2	Intermediate in THCA and CBGA, some with CBDA
SC1900021-6	Drug	France	0.28	0.01	0	0.01	0	0.15	4.99	0.01	0.01	0.01	0	0.07	2	Intermediate in THCA and CBGA, some with CBDA
SC1900021-2	Drug	France	0.24	0.02	0	0.01	0	0.11	3.84	0.02	0.01	0.01	0	0.07	2	Intermediate in THCA and CBGA, some with CBDA
SC1900021-1	Drug	France	0.21	0.01	0	0.01	0	0.13	4.4	0.02	0	0	0	0.05	2	Intermediate in THCA and CBGA, some with CBDA
SC1900021-4	Drug	France	0.088	0.054	0	0.01	0	0.07	2.68	0.01	0.01	0.01	0	0.03	2	Intermediate in THCA and CBGA, some with CBDA
SC1900021-3	Drug	France	0.18	0.01	0	0.01	0	0.1	3.51	0.01	0.01	0.01	0	0.06	2	Intermediate in THCA and CBGA, some with CBDA
SC1900021-5	Drug	France	0.13	0.01	0	0.01	0	0.06	3.07	0	0.01	0	0	0.03	2	Intermediate in THCA and CBGA, some with CBDA
SC1900021-7	Drug	France	0.11	0.02	0	0	0	0.07	2.52	0	0	0	0	0.03	2	Intermediate in THCA and CBGA, some with CBDA
ECO-028-1	Drug	Switzerland	0.01	0.033	0	0.01	0	0.12	1.349	0.01	0	0	0	0.02	2	Intermediate in THCA and CBGA, some with CBDA
ECO-027-1	Drug	India	0.123	0.01	0	0.03	0	0.03	1.627	0	0	0	0	0.03	2	Intermediate in THCA and CBGA, some with CBDA
SC1900033-4	Hemp/Fibre	na	0.06	0	0.01	0.47	0.01	0.15	3.56	0.28	0	0	0	0.05	2	Intermediate in THCA and CBGA, some with CBDA
SC1900054-3	hemp high CBD	Germany	0.07	0	0	0.11	0.01	0.14	2.8	0.1	0	0.01	0	0.03	2	Intermediate in THCA and CBGA, some with CBDA
ECO-031-3	Drug	USA	0.09	0.01	0.01	0.02	0.01	0.17	2.87	0.01	0	0	0	0.04	2	Intermediate in THCA and CBGA, some with CBDA
ECO-031-1	Drug	USA	0.11	0.01	0.01	0.02	0.01	0.19	3.31	0.02	0	0	0	0.04	2	Intermediate in THCA and CBGA, some with CBDA
SC2000003-1	Drug	Germany	0.1	0.01	0	0.01	0.02	0.18	2.92	0.03	0	0	0	0.02	2	Intermediate in THCA and CBGA, some with CBDA
SC1900042-3	Drug	Spain	0.16	0	0	0	0.02	0.1	2.19	0.03	0	0	0	0.11	2	Intermediate in THCA and CBGA, some with CBDA
SC1900042-1	Drug	Spain	0.14	0	0	0	0.02	0.11	1.67	0.08	0	0	0	0.07	2	Intermediate in THCA and CBGA, some with CBDA
ECO-022-2	Drug	China	0.051	0	0	0	0.03	0.12	1.51	0.03	0	0	0	0.1	2	Intermediate in THCA and CBGA, some with CBDA
ECO-022-1	Drug	China	0.04	0	0	0	0.03	0.11	1.48	0.02	0	0	0	0.09	2	Intermediate in THCA and CBGA, some with CBDA
ECO-019-2	Hemp	China	0.03	0	0.03	0.69	0.02	0.06	0.39	0.01	0.1	0	0.01	0.1	3	Low in all cannabinoids, many fibre types
ECO-019-3	Hemp	China	0	0	0.03	0.55	0.02	0.03	0.23	0.03	0.11	0	0.01	0.08	3	Low in all cannabinoids, many fibre types
ECO-019-1	Hemp	China	0.01	0	0.03	0.49	0.01	0.01	0.02	0	0.17	0.01	0	0.01	3	Low in all cannabinoids, many fibre types
SC1900022-6	Hemp	Romania	0.04	0	0.04	1.41	0	0.01	0.05	0.03	0.13	0	0	0	3	Low in all cannabinoids, many fibre types
SC1900034-1	Hemp/Fibre	na	0.07	0	0.04	1.64	0	0.01	0.06	0.01	0.03	0	0	0	3	Low in all cannabinoids, many fibre types
SC1900034-2	Hemp/Fibre	na	0.07	0	0.04	1.64	0	0.01	0.06	0.02	0.03	0	0	0	3	Low in all cannabinoids, many fibre types
SC1900015-2	Hemp	Romania	0.05	0	0.05	1.52	0	0.01	0.05	0.03	0.02	0	0	0	3	Low in all cannabinoids, many fibre types
SC1900038-2	Hemp/Fibre	na	0.02	0	0.06	0.95	0	0.01	0.04	0.02	0.04	0	0	0	3	Low in all cannabinoids, many fibre types
SC1900003-2	Hemp	Germany	0.05	0	0.06	0.3	0	0	0.01	0	0	0	0	0	3	Low in all cannabinoids, many fibre types
SC1900037-5	Hemp/Fibre	na	0.01	0	0.04	0.56	0	0.01	0.04	0	0.04	0.01	0	0.01	3	Low in all cannabinoids, many fibre types
SC1900037-3	Hemp/Fibre	na	0.01	0	0.04	0.56	0	0.01	0.04	0	0.04	0.01	0	0.01	3	Low in all cannabinoids, many fibre types
SC1900036-4	Hemp/Fibre	na	0.03	0	0.03	0.73	0	0.01	0.03	0	0	0	0	0	3	Low in all cannabinoids, many fibre types
ECO-030-1	Drug	Canada	0	0	0.01	0.177	0	0.01	0.103	0	0	0	0	0	3	Low in all cannabinoids, many fibre types
ECO-005-1	Hemp	Italy	0.01	0	0.03	0.58	0	0	0.06	0.01	0	0	0	0	3	Low in all cannabinoids, many fibre types
ECO-008-3	Hemp	Afghanistan	0.01	0	0.02	0.46	0	0.02	0.16	0.02	0	0	0	0	3	Low in all cannabinoids, many fibre types
ECO-008-2	Hemp	Afghanistan	0.01	0	0.02	0.2	0	0.03	0.09	0.05	0	0	0	0	3	Low in all cannabinoids, many fibre types
SC1900034-3	hemp/fibre	na	0.02	0	0.01	0.43	0	0	0.01	0.02	0.01	0	0	0	3	Low in all cannabinoids, many fibre types
SC1900037-1	hemp/fibre	na	0.01	0	0.01	0.34	0	0	0.02	0	0.04	0	0	0	3	Low in all cannabinoids, many fibre types
SC1900038-1	hemp/fibre	na	0	0	0.01	0.4	0	0	0.02	0.01	0.02	0	0	0	3	Low in all cannabinoids, many fibre types
ECO-016-3	Hemp	Spain	0	0	0	0.04	0	0.01	0.02	0	0	0	0	0	3	Low in all cannabinoids, many fibre types
ECO-016-2	Hemp	Spain	0.02	0	0.01	0.17	0	0.02	0.16	0	0	0	0	0.01	3	Low in all cannabinoids, many fibre types
ECO-012-2	Hemp	China	0.02	0	0	0	0	0.03	0.37	0	0	0	0	0.04	3	Low in all cannabinoids, many fibre types
SC1900055-1	Hemp	na	0.01	0	0.01	0.07	0	0.06	0.51	0.01	0.01	0	0	0.03	3	Low in all cannabinoids, many fibre types
SC1900029-1	Drug	na	0.02	0	0.02	0.87	0	0.03	0.89	0.02	0	0	0	0.01	3	Low in all cannabinoids, many fibre types
SC2000002-1	Drig	Slovakia	0.01	0	0.01	0.52	0	0.03	0.7	0	0.04	0	0	0.1	3	Low in all cannabinoids, many fibre types
SC2000002-1	Drug	Slovakia	0.02	0	0.02	0.53	0	0.04	0.71	0	0.04	0	0.01	0.11	3	Low in all cannabinoids, many fibre types
ECO-003-3	Hemp	China	0.02	0	0	0	0	0.04	0.44	0	0	0	0.01	0.23	3	Low in all cannabinoids, many fibre types
ECO-003-2	Hemp	China	0.02	0	0	0	0	0.02	0.42	0	0	0	0	0.02	3	Low in all cannabinoids, many fibre types
ECO-003-1	Hemp	China	0.02	0	0	0.01	0	0.04	0.35	0	0	0	0.01	0.12	3	Low in all cannabinoids, many fibre types
ECO-007-2	Hemp	China	0.01	0	0	0.01	0	0.04	0.15	0	0	0	0.01	0.06	3	Low in all cannabinoids, many fibre types
ECO-012-1	Hemp	China	0.03	0	0	0	0	0.05	0.35	0	0	0	0.01	0.05	3	Low in all cannabinoids, many fibre types
ECO-021-2	Hemp	China	0	0	0	0	0	0.01	0.1	0	0	0	0.01	0.13	3	Low in all cannabinoids, many fibre types
ECO-007-1	Hemp	China	0	0	0.01	0.04	0	0.01	0.04	0	0.02	0	0.01	0.02	3	Low in all cannabinoids, many fibre types
SC1900022-2	Hemp	Romania	0	0	0	0.03	0.01	0	0.01	0.02	0	0	0	0	3	Low in all cannabinoids, many fibre types
SC1900022-3	Hemp	Romania	0	0	0	0.04	0.01	0	0.01	0.02	0	0	0	0	3	Low in all cannabinoids, many fibre types
ECO-013-1	Hemp	China	0.02	0	0.01	0.23	0.01	0.02	0.31	0.01	0.01	0	0	0.02	3	Low in all cannabinoids, many fibre types
ECO-023-1	Hemp/Drug	China	0	0	0.01	0.23	0.01	0.02	0.11	0	0.04	0	0	0.04	3	Low in all cannabinoids, many fibre types
ECO-004-1	Hemp	China	0.01	0	0.02	0.49	0.01	0.04	0.27	0	0.04	0	0	0.04	3	Low in all cannabinoids, many fibre types
SC1900043-2	Drug	Germany	0.05	0	0.02	0.8	0.01	0.04	0.96	0.01	0.01	0	0	0.14	3	Low in all cannabinoids, many fibre types
SC1900008-1	Drug	North Korea	0.05	0	0	0.01	0.01	0.06	0.7	0	0	0	0	0.01	3	Low in all cannabinoids, many fibre types
ECO-023-2	Hemp/Drug	China	0.04	0	0	0.01	0.01	0.06	0.54	0.01	0	0	0.01	0.07	3	Low in all cannabinoids, many fibre types
SC1900059-1	Drug	North Korea	0.03	0	0	0.01	0.02	0.05	0.85	0	0	0	0.01	0.01	3	Low in all cannabinoids, many fibre types
ECO-023-3	Hemp/Drug	China	0.03	0	0.01	0	0.02	0.05	0.64	0.03	0	0	0	0.02	3	Low in all cannabinoids, many fibre types
ECO-024-1	Hemp	China	0.08	0	0.02	0.76	0.02	0.05	0.52	0.05	0	0	0	0.01	3	Low in all cannabinoids, many fibre types
ECO-015-1	Hemp	China	0.1	0	0.03	0.48	0.01	0.01	0.02	0.04	0.01	0	0	0	3	Low in all cannabinoids, many fibre types
SC1900037-4	Hemp/Fibre	na	0.01	0	0.05	0.61	0	0.01	0.04	0.18	0.03	0	0	0	3	Low in all cannabinoids, many fibre types
ECO-010-3	Drug	Netherlands	0.03	0	0	0.01	0.01	0.12	1.03	0.11	0	0	0	0.01	4	Intermediate in Δ9-THC, low in all others
SC1900024-1	Drug	Italy	0.04	0	0.01	0.18	0	0.15	1.04	0.02	0	0	0	0	4	Intermediate in Δ9-THC, low in all others
ECO-009-1	Drug	North America	0	0	0	0.02	0	0.17	0.61	0.02	0	0	0	0.01	4	Intermediate in Δ9-THC, low in all others
ECO-032-2	Drug	na	0	0	0.01	0.03	0	0.12	1.02	0.03	0	0	0	0.01	4	Intermediate in Δ9-THC, low in all others
ECO-032-1	Drug	na	0	0	0.01	0.03	0	0.12	1.01	0.03	0	0	0	0.01	4	Intermediate in Δ9-THC, low in all others
ECO-035-2	Hemp	China	0	0	0.01	0.03	0	0.12	1.12	0.06	0	0	0	0.01	4	Intermediate in Δ9-THC, low in all others
ECO-009-3	Drug	North America	0	0	0.01	0.05	0	0.09	1.46	0.02	0	0	0	0.01	4	Intermediate in Δ9-THC, low in all others
ECO-011-1	Drug	Netherlands	0.02	0.01	0	0	0	0.08	1.22	0.04	0	0	0	0.01	4	Intermediate in Δ9-THC, low in all others
ECO-010-1	Drug	Netherlands	0.03	0.01	0	0.01	0	0.13	1.21	0.09	0	0.01	0	0.01	4	Intermediate in Δ9-THC, low in all others
ECO-016-1	Hemp	Spain	0.04	0.01	0	0.01	0.01	0.16	0.56	0	0	0	0	0.01	4	Intermediate in Δ9-THC, low in all others
ECO-030-2	Drug	Canada	0.04	0.09	0	0.02	0.01	0.21	1.71	0.05	0	0	0	0.02	4	Intermediate in Δ9-THC, low in all others
ECO-035-1	Hemp	China	0	0	0.01	0.03	0	0.21	1.13	0.07	0	0	0	0.01	4	Intermediate in Δ9-THC, low in all others
ECO-011-2	Drug	Netherlands	0.06	0	0	0	0	0.23	1.44	0.04	0	0	0	0.02	4	Intermediate in Δ9-THC, low in all others
ECO-031-2	Drug	USA	0.06	0.01	0	0	0	0.26	1.96	0.05	0	0	0	0.02	4	Intermediate in Δ9-THC, low in all others
SC1900042-4	Drug	Spain	0.09	0	0	0	0.01	0.23	1.96	0.06	0	0	0.01	0.1	4	Intermediate in Δ9-THC, low in all others
ECO-029-1	Drug	Afghanistan	0.01	0.01	0.02	0.561	0	0.04	0.42	0	0	0.01	0	0.02	4	Intermediate in Δ9-THC, low in all others
ECO-025-4	Hemp	Canada	0.06	0	0	0	0	0.22	0.11	0	0	0	0.02	0.01	4	Intermediate in Δ9-THC, low in all others
ECO-026-1	Hemp	China	0	0	0	0.01	0	0.07	0.07	0	0	0	0.06	0.07	4	Intermediate in Δ9-THC, low in all others
ECO-021-3	Hemp	China	0	0	0	0	0	0.02	0.1	0.01	0	0	0.03	0.14
SC1900022-5	Hemp	Romania	0.03	0.01	0.03	0.76	0	0.01	0.03	0.01	0.01	0	0.02	0
SC1900037-6	Hemp/Fibre	na	0.01	0.01	0.04	0.45	0	0.01	0.02	0	0.02	0	0	0
ECO-018-1	Hemp	China	0.02	0.01	0.03	0.16	0.01	0	0.01	0.01	0.05	0.01	0	0
SC1900034-5	Hemp/Fibre	na	0.02	0.01	0.06	1.15	0.01	0.01	0.06	0.01	0.02	0.01	0	0	5	Intermediate in CBDA with a range in CBGA and CBDVA, low in Δ9-THC(A), mostly hemp from eastern Europe
SC1900034-4	Hemp/Fibre	na	0.03	0.01	0.08	1.53	0.01	0.02	0.07	0.02	0.03	0.01	0	0	5	Intermediate in CBDA with a range in CBGA and CBDVA, low in Δ9-THC(A), mostly hemp from eastern Europe
SC1900037-2	Hemp/Fibre	na	0.02	0.01	0.09	0.76	0.01	0.01	0.03	0.01	0.01	0	0.01	0	5	Intermediate in CBDA with a range in CBGA and CBDVA, low in Δ9-THC(A), mostly hemp from eastern Europe
SC1900012-5	Drug	na	0.06	0.01	0.05	1.46	0.01	0.02	0.05	0.07	0	0	0	0.01	5	Intermediate in CBDA with a range in CBGA and CBDVA, low in Δ9-THC(A), mostly hemp from eastern Europe
SC1900004-4	Drug	Italy	0.11	0.01	0.06	0.99	0.01	0.01	0.09	0.02	0	0	0	0	5	Intermediate in CBDA with a range in CBGA and CBDVA, low in Δ9-THC(A), mostly hemp from eastern Europe
SC1900045-2	Hemp high CBD	na	0.1	0.01	0.04	1.88	0	0.02	0.08	0.01	0.01	0	0	0	5	Intermediate in CBDA with a range in CBGA and CBDVA, low in Δ9-THC(A), mostly hemp from eastern Europe
SC1900029-3	Drug	na	0.06	0.01	0.03	1.86	0	0.03	0.55	0.01	0.02	0	0	0.01	5	Intermediate in CBDA with a range in CBGA and CBDVA, low in Δ9-THC(A), mostly hemp from eastern Europe
SC1900012-6	Drug	na	0.07	0.01	0.06	1.37	0	0.04	0.35	0.02	0.06	0	0	0.03	5	Intermediate in CBDA with a range in CBGA and CBDVA, low in Δ9-THC(A), mostly hemp from eastern Europe
ECO-017-1	Drug	Ukraine	0.1	0.01	0.06	1.31	0	0.01	0.06	0.04	0.08	0.01	0	0.01	5	Intermediate in CBDA with a range in CBGA and CBDVA, low in Δ9-THC(A), mostly hemp from eastern Europe
SC1900022-8	Hemp	Romania	0.1	0.01	0.06	1.51	0	0.01	0.05	0.01	0.09	0	0	0	5	Intermediate in CBDA with a range in CBGA and CBDVA, low in Δ9-THC(A), mostly hemp from eastern Europe
SC1900027-2	Hemp	Germany	0.09	0.01	0.08	2.02	0.01	0.02	0.08	0.01	0.13	0.01	0	0.01	5	Intermediate in CBDA with a range in CBGA and CBDVA, low in Δ9-THC(A), mostly hemp from eastern Europe
SC1900027-1	Hemp	Germany	0.1	0.01	0.07	1.98	0	0.01	0.08	0.02	0.14	0	0	0	5	Intermediate in CBDA with a range in CBGA and CBDVA, low in Δ9-THC(A), mostly hemp from eastern Europe
SC1900015-3	Hemp	Romania	0.12	0.01	0.08	2.31	0	0.03	0.08	0.02	0.09	0	0	0	5	Intermediate in CBDA with a range in CBGA and CBDVA, low in Δ9-THC(A), mostly hemp from eastern Europe
SC1900047-3	Hemp	Germany	0.12	0.01	0.08	2.25	0	0.01	0.1	0.01	0.03	0	0	0	5	Intermediate in CBDA with a range in CBGA and CBDVA, low in Δ9-THC(A), mostly hemp from eastern Europe
SC1900017-3	Hemp	Romania	0.05	0	0.09	2.5	0.01	0.02	0.1	0.05	0.04	0	0	0	5	Intermediate in CBDA with a range in CBGA and CBDVA, low in Δ9-THC(A), mostly hemp from eastern Europe
SC1900017-4	Hemp	Romania	0.1	0.01	0.09	2.24	0	0.02	0.09	0.01	0.07	0.01	0.01	0.01	5	Intermediate in CBDA with a range in CBGA and CBDVA, low in Δ9-THC(A), mostly hemp from eastern Europe
SC1900047-2	Hemp	Germany	0.08	0.01	0.12	2.17	0	0.01	0.11	0.01	0.06	0.01	0	0	5	Intermediate in CBDA with a range in CBGA and CBDVA, low in Δ9-THC(A), mostly hemp from eastern Europe
SC1900027-3	Hemp	Germany	0.06	0.01	0.1	2.63	0	0.02	0.09	0.08	0.13	0.01	0	0.01	5	Intermediate in CBDA with a range in CBGA and CBDVA, low in Δ9-THC(A), mostly hemp from eastern Europe
SC1900012-2	Drug	na	0.06	0.02	0.05	2.03	0.01	0.01	0.08	0.06	0.07	0	0	0	5	Intermediate in CBDA with a range in CBGA and CBDVA, low in Δ9-THC(A), mostly hemp from eastern Europe
SC1900002-1	Hemp	Hungary	0.09	0.01	0.05	1.84	0.01	0.02	0.07	0.08	0.09	0	0	0.01	5	Intermediate in CBDA with a range in CBGA and CBDVA, low in Δ9-THC(A), mostly hemp from eastern Europe
SC1900022-7	Hemp	Romania	0.08	0.05	0.07	2.239	0	0.02	0.09	0.06	0.21	0.01	0	0.01	5	Intermediate in CBDA with a range in CBGA and CBDVA, low in Δ9-THC(A), mostly hemp from eastern Europe
SC1900022-4	Hemp	Romania	0.09	0.05	0.07	2.196	0	0.02	0.06	0.01	0.11	0.01	0	0.01	5	Intermediate in CBDA with a range in CBGA and CBDVA, low in Δ9-THC(A), mostly hemp from eastern Europe
SC1900016-5	Hemp	Romania	0.1	0.01	0.09	0.75	0.01	0.02	0.1	0.01	0.14	0.01	0	0.01	5	Intermediate in CBDA with a range in CBGA and CBDVA, low in Δ9-THC(A), mostly hemp from eastern Europe
SC1900043-3	Drug	na	0.15	0.01	0.04	2.1	0.01	0.02	0.57	0.02	0.06	0	0	0.08	5	Intermediate in CBDA with a range in CBGA and CBDVA, low in Δ9-THC(A), mostly hemp from eastern Europe
SC1900002-6	Hemp	Hungary	0.13	0.01	0.04	2.13	0.02	0.02	0.13	0.06	0.08	0	0	0.01	5	Intermediate in CBDA with a range in CBGA and CBDVA, low in Δ9-THC(A), mostly hemp from eastern Europe
SC1900002-3	Hemp	Hungary	0.13	0.01	0.06	2.1	0.02	0.02	0.13	0.06	0.08	0	0	0	5	Intermediate in CBDA with a range in CBGA and CBDVA, low in Δ9-THC(A), mostly hemp from eastern Europe
SC1900002-4	Hemp	Hungary	0.09	0	0.05	1.68	0.02	0.02	0.07	0.1	0.08	0	0	0	5	Intermediate in CBDA with a range in CBGA and CBDVA, low in Δ9-THC(A), mostly hemp from eastern Europe
SC1900002-5	Hemp	Hungary	0.09	0	0.05	1.68	0.02	0.02	0.07	0.1	0.08	0	0	0	5	Intermediate in CBDA with a range in CBGA and CBDVA, low in Δ9-THC(A), mostly hemp from eastern Europe
SC1900045-1	Hemp high CBD	na	0.12	0	0.06	2.28	0.01	0.02	0.09	0.05	0	0	0	0	5	Intermediate in CBDA with a range in CBGA and CBDVA, low in Δ9-THC(A), mostly hemp from eastern Europe
SC1900046-1	Hemp	na	0.09	0	0.06	2.85	0.01	0.01	0.1	0.02	0.02	0	0	0	5	Intermediate in CBDA with a range in CBGA and CBDVA, low in Δ9-THC(A), mostly hemp from eastern Europe
SC1900029-2	Drug	na	0.07	0	0.05	2.69	0.01	0.02	0.17	0.06	0.03	0	0	0	5	Intermediate in CBDA with a range in CBGA and CBDVA, low in Δ9-THC(A), mostly hemp from eastern Europe
SC1900006-3	Drug	Romania	0.03	0	0.1	2.28	0.01	0.02	0.08	0.05	0.04	0	0	0	5	Intermediate in CBDA with a range in CBGA and CBDVA, low in Δ9-THC(A), mostly hemp from eastern Europe
SC1900030-2	Hemp/Fibre	na	0.04	0	0.08	2.2	0.01	0.01	0.07	0.02	0.04	0	0	0	5	Intermediate in CBDA with a range in CBGA and CBDVA, low in Δ9-THC(A), mostly hemp from eastern Europe
SC1900007-1	Hemp	Georgia	0.03	0	0.09	1.49	0.01	0.03	0.21	0.01	0.02	0	0	0.01	5	Intermediate in CBDA with a range in CBGA and CBDVA, low in Δ9-THC(A), mostly hemp from eastern Europe
ECO-001-1	Hemp	Afghanistan	0.04	0	0.09	1.73	0.01	0.03	0.06	0.04	0.02	0	0	0	5	Intermediate in CBDA with a range in CBGA and CBDVA, low in Δ9-THC(A), mostly hemp from eastern Europe
SC1900012-1	Drug	na	0.07	0	0.09	1.3	0.01	0.02	0.05	0.06	0.05	0	0	0	5	Intermediate in CBDA with a range in CBGA and CBDVA, low in Δ9-THC(A), mostly hemp from eastern Europe
SC1900017-2	Hemp	Romania	0.07	0	0.09	1.88	0.01	0.02	0.06	0.02	0.12	0	0	0	5	Intermediate in CBDA with a range in CBGA and CBDVA, low in Δ9-THC(A), mostly hemp from eastern Europe
SC1900016-1	Hemp	Romania	0.05	0	0.11	3.06	0.01	0.02	0.1	0.02	0.08	0	0	0	5	Intermediate in CBDA with a range in CBGA and CBDVA, low in Δ9-THC(A), mostly hemp from eastern Europe
SC1900031-1	Hemp	Turkey	0.02	0	0.13	1.32	0	0.02	0.04	0.01	0.03	0.02	0	0	5	Intermediate in CBDA with a range in CBGA and CBDVA, low in Δ9-THC(A), mostly hemp from eastern Europe
SC1900016-4	Hemp	Romania	0.07	0.01	0.12	2.91	0.01	0.02	0.11	0.03	0.16	0.01	0	0	5	Intermediate in CBDA with a range in CBGA and CBDVA, low in Δ9-THC(A), mostly hemp from eastern Europe
SC1900018-1	Hemp	Romania	0.07	0.01	0.09	2.89	0.01	0.02	0.11	0.03	0.22	0.01	0	0.01	5	Intermediate in CBDA with a range in CBGA and CBDVA, low in Δ9-THC(A), mostly hemp from eastern Europe
SC1900018-3	Hemp	Romania	0.1	0.01	0.09	3.39	0	0.02	0.14	0.02	0.28	0.01	0	0.01	5	Intermediate in CBDA with a range in CBGA and CBDVA, low in Δ9-THC(A), mostly hemp from eastern Europe
SC1900016-2	Hemp	Romania	0.11	0	0.1	2.19	0.01	0.02	0.07	0.08	0.2	0.01	0	0	5	Intermediate in CBDA with a range in CBGA and CBDVA, low in Δ9-THC(A), mostly hemp from eastern Europe
SC1900018-2	Hemp	Romania	0.05	0	0.07	1.8	0.01	0.01	0.06	0.03	0.33	0.01	0	0.01	5	Intermediate in CBDA with a range in CBGA and CBDVA, low in Δ9-THC(A), mostly hemp from eastern Europe
SC2000001-2	Drug	na	0.1	0.01	0.03	1.18	0.02	0.07	1.2	0.09	0.08	0.01	0.01	0.12
SC2000001-1	Drug	na	0.09	0.01	0.03	1.45	0.01	0.02	0.06	0.01	0.21	0.01	0	0.01
SC1900026-1	Drug	Croatia	0.06	0.01	0.08	0.79	0.02	0.12	0.61	0.02	0	0	0.01	0.01	6	intermediate in most C5 and low to zero for C3 annabinoids. Similar in THCA and CBDA.
ECO-002-1	Hemp	France	0.07	0.02	0.1	0.57	0.01	0.11	0.37	0.03	0.01	0.01	0.01	0.01	6	intermediate in most C5 and low to zero for C3 annabinoids. Similar in THCA and CBDA.
SC1900026-4	Drug	Croatia	0.1	0.02	0.07	1.54	0.01	0.11	0.47	0.02	0.01	0.01	0	0.01	6	intermediate in most C5 and low to zero for C3 annabinoids. Similar in THCA and CBDA.
SC1900013-6	Drug	Romania	0.05	0.01	0.05	1.44	0	0.14	1.04	0.01	0.05	0	0.01	0.09	6	intermediate in most C5 and low to zero for C3 annabinoids. Similar in THCA and CBDA.
SC1900009-1	Drug	Italy	0.03	0.01	0.02	0.51	0.01	0.1	1.29	0.04	0.01	0	0	0.02	6	intermediate in most C5 and low to zero for C3 annabinoids. Similar in THCA and CBDA.
SC1900009-2	Drug	Italy	0.03	0.01	0.04	1.5	0.01	0.1	1.74	0.1	0.03	0	0	0.05	6	intermediate in most C5 and low to zero for C3 annabinoids. Similar in THCA and CBDA.
SC1900026-3	Drug	Croatia	0.11	0.01	0.07	1.59	0	0.13	0.88	0.12	0	0	0	0.01	6	intermediate in most C5 and low to zero for C3 annabinoids. Similar in THCA and CBDA.
SC1900026-2	Drug	Croatia	0.09	0	0.05	1.34	0.01	0.13	1.41	0.11	0.01	0	0	0.01	6	intermediate in most C5 and low to zero for C3 annabinoids. Similar in THCA and CBDA.
ECO-010-2	Drug	Netherlands	0.08	0.02	0.06	1.24	0	0.11	1.25	0.06	0.01	0	0	0.02	6	intermediate in most C5 and low to zero for C3 annabinoids. Similar in THCA and CBDA.
SC1900026-5	Drug	Croatia	0.1	0.01	0.03	1.6	0	0.1	0.87	0.01	0	0	0	0	6	intermediate in most C5 and low to zero for C3 annabinoids. Similar in THCA and CBDA.
SC1900032-2	Drug	na	0.13	0.01	0.03	2.07	0	0.07	2.1	0.02	0.01	0	0	0.03	6	intermediate in most C5 and low to zero for C3 annabinoids. Similar in THCA and CBDA.
SC1900034-6	Hemp/fibre	na	0.14	0.01	0.03	2.23	0	0.07	2.39	0.02	0.01	0	0	0.03	6	intermediate in most C5 and low to zero for C3 annabinoids. Similar in THCA and CBDA.
SC1900024-3	Drug	Italy	0.21	0.01	0.06	1.52	0	0.06	0.45	0.02	0.01	0	0	0	6	intermediate in most C5 and low to zero for C3 annabinoids. Similar in THCA and CBDA.
SC1900032-3	Drug	na	0.21	0.01	0.06	2.36	0.01	0.1	2.03	0.05	0	0	0	0	6	intermediate in most C5 and low to zero for C3 annabinoids. Similar in THCA and CBDA.
SC1900032-1	Drug	na	0.22	0.01	0.06	2.36	0.01	0.1	2.03	0.06	0	0	0	0	6	intermediate in most C5 and low to zero for C3 annabinoids. Similar in THCA and CBDA.
SC1900054-5	hemp high CBD	Germany	0.21	0.02	0.04	2.05	0.02	0.08	1.62	0.03	0.03	0	0	0.01	6	intermediate in most C5 and low to zero for C3 annabinoids. Similar in THCA and CBDA.
SC1900033-6	Hemp/Fibre	na	0.17	0.02	0.07	3.14	0.01	0.07	1.73	0.03	0.01	0	0	0.02	6	intermediate in most C5 and low to zero for C3 annabinoids. Similar in THCA and CBDA.
SC1900062-6	Hemp	na	0.13	0.02	0.09	3	0.01	0.09	1.22	0.02	0.06	0.01	0.01	0.09	6	intermediate in most C5 and low to zero for C3 annabinoids. Similar in THCA and CBDA.
SC1900064-5	Drug	Argentina	0.16	0.02	0.09	5.2	0.04	0.02	0.21	0.02	0.03	0.01	0.04	0	6	intermediate in most C5 and low to zero for C3 annabinoids. Similar in THCA and CBDA.
SC1900009-7	Drug	Italy	0.09	0.02	0.07	2.56	0.01	0.13	1.89	0.02	0.02	0.01	0	0.04	6	intermediate in most C5 and low to zero for C3 annabinoids. Similar in THCA and CBDA.
SC1900004-5	Drug	Italy	0.13	0.03	0.09	2.26	0.01	0.16	1.64	0	0	0	0	0	6	intermediate in most C5 and low to zero for C3 annabinoids. Similar in THCA and CBDA.
SC1900064-6	Drug	Argentina	0.13	0.02	0.07	2.23	0.01	0.16	2.33	0.03	0.09	0	0.01	0.17	6	intermediate in most C5 and low to zero for C3 annabinoids. Similar in THCA and CBDA.
SC1900012-4	Drug	na	0.15	0.01	0.06	1.26	0.01	0.2	1.23	0.07	0.06	0	0.02	0.12	6	intermediate in most C5 and low to zero for C3 annabinoids. Similar in THCA and CBDA.
SC1900012-3	Drug	na	0.14	0.01	0.05	1.63	0.01	0.16	1.85	0.07	0.06	0	0	0.15	6	intermediate in most C5 and low to zero for C3 annabinoids. Similar in THCA and CBDA.
SC1900065-1	Drug	Germany	0.11	0.01	0.14	2.62	0	0.17	1.65	0.01	0.03	0	0	0.04	7	high in CBDA, intermediate CBGA, CBDVA and CBN, low in Δ9-THCA
SC1900003-1	Hemp	Germany	0.15	0.01	0.26	1.21	0	0.02	0.05	0	0	0	0	0	7	high in CBDA, intermediate CBGA, CBDVA and CBN, low in Δ9-THCA
SC1900036-2	Hemp/Fibre	na	0.02	0.01	0.25	1.25	0.01	0.03	0.04	0.01	0	0.01	0	0	7	high in CBDA, intermediate CBGA, CBDVA and CBN, low in Δ9-THCA
SC1900062-2	Hemp	na	0.01	0.01	0.19	2.22	0.01	0.02	0.07	0.05	0	0	0	0	7	high in CBDA, intermediate CBGA, CBDVA and CBN, low in Δ9-THCA
SC1900022-1	Hemp	Romania	0.02	0.01	0.13	0.95	0.02	0.02	0.03	0.06	0.02	0	0	0	7	high in CBDA, intermediate CBGA, CBDVA and CBN, low in Δ9-THCA
SC1900054-2	hemp high CBD	Germany	0.15	0	0.07	2.99	0.05	0.02	0.14	0.06	0.01	0	0	0	7	high in CBDA, intermediate CBGA, CBDVA and CBN, low in Δ9-THCA
SC1900062-1	Hemp	na	0.22	0.02	0.15	5.38	0.03	0.04	0.19	0.18	0.04	0.01	0	0	7	high in CBDA, intermediate CBGA, CBDVA and CBN, low in Δ9-THCA
SC1900033-3	Hemp/fibre	na	0.03	0.01	0.05	1.99	0.02	0.15	2.69	0.14	0.02	0	0	0.07	7	high in CBDA, intermediate CBGA, CBDVA and CBN, low in Δ9-THCA
SC1900062-3	Hemp	na	0.21	0.02	0.1	3.92	0.02	0.03	0.15	0.23	0.04	0.01	0.03	0	7	high in CBDA, intermediate CBGA, CBDVA and CBN, low in Δ9-THCA
SC1900006-1	Drug	Romania	0.19	0.02	0.14	4.81	0	0.04	0.2	0.09	0.02	0	0.02	0	7	high in CBDA, intermediate CBGA, CBDVA and CBN, low in Δ9-THCA
SC1900060-3	Hemp	Syria	0.1	0.02	0.17	4.37	0	0.02	0.14	0.01	0.02	0	0	0	7	high in CBDA, intermediate CBGA, CBDVA and CBN, low in Δ9-THCA
SC1900009-4	Drug	Italy	0.07	0.01	0.12	4.05	0	0.05	0.25	0.07	0.02	0	0.01	0	7	high in CBDA, intermediate CBGA, CBDVA and CBN, low in Δ9-THCA
SC1900013-5	Drug	Romania	0.09	0.01	0.15	3.9	0.01	0.04	0.21	0.17	0.04	0	0	0.01	7	high in CBDA, intermediate CBGA, CBDVA and CBN, low in Δ9-THCA
ECO-001-2	Hemp	Afghanistan	0.05	0.01	0.18	3.3	0.01	0.04	0.12	0.14	0.03	0.01	0	0	7	high in CBDA, intermediate CBGA, CBDVA and CBN, low in Δ9-THCA
ECO-001-3	Hemp	Afghanistan	0.07	0.01	0.22	3.68	0.02	0.04	0.13	0.22	0.03	0.01	0	0	7	high in CBDA, intermediate CBGA, CBDVA and CBN, low in Δ9-THCA
SC1900016-3	Hemp	Romania	0.11	0.01	0.17	4.71	0.02	0.03	0.16	0.13	0.11	0	0	0	7	high in CBDA, intermediate CBGA, CBDVA and CBN, low in Δ9-THCA
SC1900019-1	Hemp	Romania	0.12	0.01	0.15	3.83	0.01	0.02	0.11	0.05	0.06	0	0	0	7	high in CBDA, intermediate CBGA, CBDVA and CBN, low in Δ9-THCA
SC1900047-1	Hemp	Germany	0.18	0.01	0.12	3.28	0.02	0.02	0.13	0.05	0.07	0	0	0	7	high in CBDA, intermediate CBGA, CBDVA and CBN, low in Δ9-THCA
SC1900030-4	Hemp/Fibre	na	0.18	0.02	0.11	2.96	0.01	0.02	0.11	0.04	0.16	0	0	0.01	7	high in CBDA, intermediate CBGA, CBDVA and CBN, low in Δ9-THCA
SC1900015-1	Hemp	Romania	0.16	0.01	0.12	2.87	0.01	0.03	0.1	0.06	0.14	0.01	0	0	7	high in CBDA, intermediate CBGA, CBDVA and CBN, low in Δ9-THCA
SC1900033-5	Hemp/Fibre	na	0.13	0.01	0.07	3.23	0.02	0.03	0.4	0.18	0	0	0	0	7	high in CBDA, intermediate CBGA, CBDVA and CBN, low in Δ9-THCA
SC1900054-1	Hemp high CBD	Germany	0.19	0	0.07	3.38	0.02	0.02	0.12	0.12	0.05	0	0	0	7	high in CBDA, intermediate CBGA, CBDVA and CBN, low in Δ9-THCA
SC1900043-1	Drug	na	0.25	0.01	0.12	4.37	0.03	0.03	0.17	0.01	0.13	0	0	0	7	high in CBDA, intermediate CBGA, CBDVA and CBN, low in Δ9-THCA
SC1900052-1	Hemp-high CBD	Germany	0.37	0.01	0.09	3.92	0.03	0.03	0.16	0.05	0.03	0	0	0	7	high in CBDA, intermediate CBGA, CBDVA and CBN, low in Δ9-THCA
SC1900004-3	Drug	Germany	0.23	0.02	0.1	2.73	0.02	0.02	0.14	0	0	0	0	0	7	high in CBDA, intermediate CBGA, CBDVA and CBN, low in Δ9-THCA
SC1900036-5	Hemp/Fibre	na	0.31	0.03	0.08	3.33	0.01	0.01	0.13	0.03	0.02	0	0	0	7	high in CBDA, intermediate CBGA, CBDVA and CBN, low in Δ9-THCA
ECO-015-2	Hemp	China	0.34	0.03	0	0.01	0	0	0	0	0	0	0	0
ECO-020-3	Hemp	China	0.12	0.03	0	0.01	0	0.28	0.78	0.01	0.01	0	0.01	0.02	8	high in Δ9-THCA, mostly high CBGA, a range of CBC, and mostly intermediate THCVA
ECO-009-2	Drug	North America	0.17	0.04	0	0.01	0	0.28	3.67	0.05	0	0	0	0.05	8	high in Δ9-THCA, mostly high CBGA, a range of CBC, and mostly intermediate THCVA
ECO-033-1	Drug	na	0.05	0.03	0.01	0.02	0.01	0.13	5.09	0.04	0	0	0.01	0.04	8	high in Δ9-THCA, mostly high CBGA, a range of CBC, and mostly intermediate THCVA
SC1900004-1	Drug	Italy	0.09	0.04	0.06	1.55	0.01	0.08	0.97	0	0	0	0	0	8	high in Δ9-THCA, mostly high CBGA, a range of CBC, and mostly intermediate THCVA
SC1900004-2	Drug	Italy	0.13	0.03	0.11	2.63	0.04	0.16	1.69	0.05	0	0	0	0	8	high in Δ9-THCA, mostly high CBGA, a range of CBC, and mostly intermediate THCVA
SC1900063-1	Drug	North Korea	0.17	0.04	0.01	0.14	0.04	0.19	2.21	0.03	0	0	0	0.01	8	high in Δ9-THCA, mostly high CBGA, a range of CBC, and mostly intermediate THCVA
ECO-006-2	Drug	United Kingdom	0.24	0.07	0.01	0.01	0.01	0.3	3.48	0.04	0	0	0.01	0.2	8	high in Δ9-THCA, mostly high CBGA, a range of CBC, and mostly intermediate THCVA
ECO-020-2	Drug	USA	0.37	0.02	0.01	0.03	0.01	0.21	2.48	0	0	0	0.01	0.04	8	high in Δ9-THCA, mostly high CBGA, a range of CBC, and mostly intermediate THCVA
ECO-020-1	Drug	USA	0.54	0.03	0.01	0.03	0.01	0.23	2.6	0	0	0	0.01	0.03	8	high in Δ9-THCA, mostly high CBGA, a range of CBC, and mostly intermediate THCVA
ECO-006-1	Drug	United Kingdom	0.22	0.01	0	0.01	0	0.29	1.81	0.04	0	0.01	0	0.02	8	high in Δ9-THCA, mostly high CBGA, a range of CBC, and mostly intermediate THCVA
SC1900042-5	Drug	Spain	0.19	0.01	0	0.01	0.02	0.31	2.76	0.04	0	0	0.02	0.18	8	high in Δ9-THCA, mostly high CBGA, a range of CBC, and mostly intermediate THCVA
SC1900042-7	Drug	Spain	0.33	0	0	0.02	0.02	0.29	4.45	0.03	0	0	0.01	0.2	8	high in Δ9-THCA, mostly high CBGA, a range of CBC, and mostly intermediate THCVA
SC1900059-3	Drug	North Korea	0.36	0	0	0.02	0.02	0.3	4.75	0.03	0	0	0.01	0.21	8	high in Δ9-THCA, mostly high CBGA, a range of CBC, and mostly intermediate THCVA
SC1900042-6	Drug	Spain	0.37	0.01	0.01	0.01	0.02	0.24	4.62	0.08	0	0	0.01	0.27	8	high in Δ9-THCA, mostly high CBGA, a range of CBC, and mostly intermediate THCVA
SC1900042-2	Drug	Spain	0.33	0.01	0.01	0	0.03	0.24	4.3	0.06	0	0	0.01	0.18	8	high in Δ9-THCA, mostly high CBGA, a range of CBC, and mostly intermediate THCVA
SC1900064-2	Drug	Argentina	0.29	0.01	0.09	2.99	0.03	0.39	5.36	0.18	0	0.01	0	0.03	8	high in Δ9-THCA, mostly high CBGA, a range of CBC, and mostly intermediate THCVA
SC2000003-2	Drug	Germany	0.12	0.01	0.01	0.02	0.07	0.25	4.35	0.11	0	0	0	0.02	8	high in Δ9-THCA, mostly high CBGA, a range of CBC, and mostly intermediate THCVA
SC1900059-2	Drug	North Korea	0.13	0.03	0.01	0.02	0.07	0.19	3.85	0.23	0	0	0	0.01	8	high in Δ9-THCA, mostly high CBGA, a range of CBC, and mostly intermediate THCVA
SC1900054-4	Hemp high CBD	Germany	0.28	0.01	0	0.12	0.05	0.13	3.8	0.12	0	0	0	0.01	8	high in Δ9-THCA, mostly high CBGA, a range of CBC, and mostly intermediate THCVA
SC1900002-2	Hemp	Germany	0.32	0.01	0.04	1.44	0.06	0.1	1.55	0.13	0.02	0	0	0.05	8	high in Δ9-THCA, mostly high CBGA, a range of CBC, and mostly intermediate THCVA
SC1900062-4	Hemp	na	0.21	0.02	0.14	7.55	0.09	0.08	0.3	0.01	0.11	0.01	0	0.01	9	high in CBDA and CBGA
SC1900009-6	Drug	Italy	0.48	0.04	0.13	7.63	0.06	0.04	0.38	0.09	0.07	0.01	0	0	9	high in CBDA and CBGA
SC1900060-2	Hemp	Syria	0.13	0.03	0.25	5.73	0.01	0.03	0.2	0.05	0.04	0.01	0	0	9	high in CBDA and CBGA
SC1900060-1	Hemp	Syria	0.23	0.04	0.37	9.76	0.02	0.03	0.38	0.07	0.08	0.01	0	0	9	high in CBDA and CBGA
SC1900048-1	Hemp	Turkey	0.2	0.04	0.19	7.47	0	0.02	0.26	0.17	0.03	0	0	0	9	high in CBDA and CBGA
SC1900062-5	Hemp	na	0.16	0.01	0.16	7.55	0	0.04	0.3	0.1	0.05	0	0	0	9	high in CBDA and CBGA
SC1900017-1	Hemp	Romania	0.29	0.02	0.23	4.87	0.01	0.05	0.17	0.1	0.04	0	0	0	9	high in CBDA and CBGA
SC1900030-1	Hemp/Fibre	na	0.34	0.03	0.22	3.88	0.01	0.03	0.12	0.07	0.02	0	0	0	9	high in CBDA and CBGA
ECO-017-2	Drug	Ukraine	0.3	0.03	0.25	2.26	0.01	0.03	0.12	0.02	0.06	0.01	0	0.01	9	high in CBDA and CBGA
SC1900024-2	Drug	Italy	0.44	0.03	0.18	3.47	0.01	0.03	0.15	0.21	0.02	0	0	0	9	high in CBDA and CBGA
SC1900036-1	Hemp/Fibre	na	0.54	0.02	0.21	5.15	0.03	0.04	0.19	0.04	0.04	0	0	0	9	high in CBDA and CBGA
SC1900036-3	Hemp/Fibre	na	0.26	0.06	0.12	3.54	0.01	0.02	0.13	0.03	0.01	0	0	0	9	high in CBDA and CBGA
ECO-008-1	Hemp	Afghanistan	0.01	0	0.02	0.43	0	0.03	0.16	0.76	0	0	0	0
ECO-034-1	Drug	China	0.05	0	0.03	1.042	0.02	0	0.04	0	0	0	0	0
ECO-034-2	Drug	China	0	0	0.03	0.198	0	0.04	0.12	0	0	0	0	0
ECO-018-3	Hemp	China	0.02	0	0.02	0.15	0.01	0.01	0.01	0.01	0.63	0.06	0.01	0.04
ECO-018-2	Hemp	China	0.02	0	0.02	0.07	0.02	0.01	0.01	0.01	0.45	0.13	0.01	0.02
SC1900030-3	Hemp/Fibre	na	0.24	0.01	0.2	5.17	0.02	0.04	0.19	0.07	0.74	0.03	0	0.03
SC1900066-2	Drug	na	0.33	0.01	0	0.02	0.03	0.58	10.51	0.15	0	0	0.01	0.19
SC1900066-1	Drug	na	0.17	0.02	0.01	0.08	0.06	0.44	7.45	0.28	0	0	0	0.06
	100

## Sheet: Table S4
Table S4: Summary of the chemometric algorithms, model number and type for the 12 individual cannabinoids. Everything listed in the table was determined through the Hone Create pre-processing algorithms. The table lists the cannabinoid, model number, model type used to achieve the best performing model, data transformations undertaken on the NIR spectra and the technical replicate treatments. Unm…
Cannabinoid	Hone model number	Model type	Data transformation	Replicate treatment
CBD	19156	Stacked ensemble	Baseline shift, Area normalisation	unmerged
CBDA	19137	Stacked ensemble	1st Order Derivative	unmerged
Δ9-THC	19158	Stacked ensemble	Smoothing, 1st Order Derivative	unmerged
Δ9-THCA	19179	Stacked ensemble	1st Order Derivative	unmerged
THCV	19161	Stacked ensemble	Baseline shift, Area normalisation	unmerged
THCVA	19180	Stacked ensemble	1st Order Derivative	unmerged
CBDV	17199	Gradient boosting machine	Area normalisation	merged
CBDVA	19162	Stacked ensemble	Baseline shift, Area normalisation, Smoothing	unmerged
CBG	19164	Stacked ensemble	Standard normal variate	unmerged
CBGA	19178	Stacked ensemble	Area normalisation	unmerged
CBC	19096	Stacked ensemble	Area normalisation	unmerged
CBN	19097	Gradient boosting machine	Area normalisation, Smoothing	unmerged

## Sheet: Table S5
Table S5: Metadata for final models
Hone model no.	IdAnalysisAuto	R2	Accuracy	Rmse	DataPreprocessing	EnsembleDescription	AuditUser	IsProcessing	ModelId	PickupDate	Exception	ModelDesc	ProcessForSeconds	IdFrequencyProfile	Leaderboard	ModelJson	IsConverted	RetryAttempts	IdVirtualMachine	IdMlVersion	PostProcessingSteps
17199	4214	0.375988	58.3387	0.0081	1			0	7dd1dafd-0b0b-4409-9733-f99d214b19b6	00:22:24.400000		Model Details||=============||H2OGradientBoostingEstimator : Gradient Boosting Machine||Model Key: GBM_grid__1_AutoML_20210504_013151_model_8||||||Model Summary: || number_of_trees number_of_internal_trees model_size_in_bytes min_depth max_depth mean_depth min_leaves max_leaves mean_leaves||-- ----------------- -------------------------- --------------------- ----------- ----------- ------------ …	6000	34	model_id mean_residual_deviance rmse mse mae rmsle||--------------------------------------------------- ------------------------ ---------- ----------- ---------- ----------||GBM_grid__1_AutoML_20210504_013151_model_8 8.20063e-05 0.00905573 8.20063e-05 0.00331799 0.00861533||GBM_grid__1_AutoML_20210504_013151_model_2 8.21443e-05 0.00906335 8.21443e-05 0.00328924 0.00862243||GBM_grid__1_AutoML_202…	{'__meta': {'schema_version': 3, 'schema_name': 'GBMModelV3', 'schema_type': 'GBMModel'}, 'model_id': {'__meta': {'schema_version': 3, 'schema_name': 'ModelKeyV3', 'schema_type': 'Key<Model>'}, 'name': 'GBM_grid__1_AutoML_20210504_013151_model_8', 'type': 'Key<Model>', 'URL': '/3/Models/GBM_grid__1_AutoML_20210504_013151_model_8'}, 'algo': 'gbm', 'algo_full_name': 'Gradient Boosting Machine', 're…	0	0		6
19096	6111	0.996803	94.0433	0.0016	1			0	d81a1261-9bdb-40b9-9120-9145085d456a	00:15:34		Model Details||=============||H2OStackedEnsembleEstimator : Stacked Ensemble||Model Key: StackedEnsemble_AllModels_AutoML_20210707_072458||||No model summary for this model||||ModelMetricsRegressionGLM: stackedensemble||** Reported on train data. **||||MSE: 2.486515350238389e-06||RMSE: 0.0015768688437020973||MAE: 0.0010847197408013843||RMSLE: 0.0015112578874615314||R^2: 0.9787089802828283||Mean R…	6000	34	model_id mean_residual_deviance rmse mse mae rmsle||--------------------------------------------------- ------------------------ ---------- ----------- ---------- ----------||StackedEnsemble_AllModels_AutoML_20210707_072458 3.76288e-05 0.00613423 3.76288e-05 0.00295345 0.0058793||StackedEnsemble_BestOfFamily_AutoML_20210707_072458 3.9294e-05 0.0062685 3.9294e-05 0.00308289 0.00601881||GBM_grid__1…	{'__meta': {'schema_version': 99, 'schema_name': 'StackedEnsembleModelV99', 'schema_type': 'StackedEnsembleModel'}, 'model_id': {'__meta': {'schema_version': 3, 'schema_name': 'ModelKeyV3', 'schema_type': 'Key<Model>'}, 'name': 'StackedEnsemble_AllModels_AutoML_20210707_072458', 'type': 'Key<Model>', 'URL': '/3/Models/StackedEnsemble_AllModels_AutoML_20210707_072458'}, 'algo': 'stackedensemble', …	0	0		6
19097	6112	0.99833	92.0095	0.0035	1,3			0	7c109059-edf7-4b23-9bb2-31744025f99d	00:17:26.900000		Model Details||=============||H2OGradientBoostingEstimator : Gradient Boosting Machine||Model Key: GBM_1_AutoML_20210707_072856||||||Model Summary: || number_of_trees number_of_internal_trees model_size_in_bytes min_depth max_depth mean_depth min_leaves max_leaves mean_leaves||-- ----------------- -------------------------- --------------------- ----------- ----------- ------------ ------------ -…	6000	34	model_id mean_residual_deviance rmse mse mae rmsle||--------------------------------------------------- ------------------------ --------- ---------- --------- ---------||GBM_1_AutoML_20210707_072856 0.0012498 0.0353525 0.0012498 0.0202746 0.0312251||StackedEnsemble_BestOfFamily_AutoML_20210707_072856 0.0012727 0.035675 0.0012727 0.0198031 0.0313431||StackedEnsemble_AllModels_AutoML_20210707_0728…	{'__meta': {'schema_version': 3, 'schema_name': 'GBMModelV3', 'schema_type': 'GBMModel'}, 'model_id': {'__meta': {'schema_version': 3, 'schema_name': 'ModelKeyV3', 'schema_type': 'Key<Model>'}, 'name': 'GBM_1_AutoML_20210707_072856', 'type': 'Key<Model>', 'URL': '/3/Models/GBM_1_AutoML_20210707_072856'}, 'algo': 'gbm', 'algo_full_name': 'Gradient Boosting Machine', 'response_column_name': 'result…	0	0		6
19137	6152	0.998312	-59.4139	0.1581	6			0	f7c299b4-4a38-485f-b8ce-4da7b8a6cc9a	00:16:41.100000		Model Details||=============||H2OStackedEnsembleEstimator : Stacked Ensemble||Model Key: StackedEnsemble_AllModels_AutoML_20210709_043140||||No model summary for this model||||ModelMetricsRegressionGLM: stackedensemble||** Reported on train data. **||||MSE: 0.02500883801001903||RMSE: 0.1581418287804306||MAE: 0.11820717856551977||RMSLE: 0.08063685559173678||R^2: 0.9914146425312707||Mean Residual D…	6000	34	model_id mean_residual_deviance rmse mse mae rmsle||--------------------------------------------------- ------------------------ -------- -------- -------- --------||StackedEnsemble_AllModels_AutoML_20210709_043140 0.387495 0.622491 0.387495 0.399311 0.226976||StackedEnsemble_BestOfFamily_AutoML_20210709_043140 0.42091 0.648776 0.42091 0.430538 0.238779||GBM_grid__1_AutoML_20210709_043140_model_5…	{'__meta': {'schema_version': 99, 'schema_name': 'StackedEnsembleModelV99', 'schema_type': 'StackedEnsembleModel'}, 'model_id': {'__meta': {'schema_version': 3, 'schema_name': 'ModelKeyV3', 'schema_type': 'Key<Model>'}, 'name': 'StackedEnsemble_AllModels_AutoML_20210709_043140', 'type': 'Key<Model>', 'URL': '/3/Models/StackedEnsemble_AllModels_AutoML_20210709_043140'}, 'algo': 'stackedensemble', …	0	0		6
19156	6171	0.991867	83.3952	0.0121	0,1			0	6aad3ac2-5980-4a03-b076-3c17fd6a7600	00:32:55.300000		Model Details||=============||H2OStackedEnsembleEstimator : Stacked Ensemble||Model Key: StackedEnsemble_BestOfFamily_AutoML_20210709_054820||||No model summary for this model||||ModelMetricsRegressionGLM: stackedensemble||** Reported on train data. **||||MSE: 0.00014563952097796097||RMSE: 0.01206812002666368||MAE: 0.008518105324340067||RMSLE: 0.009924835316146172||R^2: 0.9804464703630514||Mean R…	6000	34	model_id mean_residual_deviance rmse mse mae rmsle||--------------------------------------------------- ------------------------ --------- ---------- --------- ---------||StackedEnsemble_BestOfFamily_AutoML_20210709_054820 0.00139066 0.0372916 0.00139066 0.0238872 0.0317758||GBM_grid__1_AutoML_20210709_054820_model_49 0.00149063 0.0386087 0.00149063 0.0239878 0.0324431||StackedEnsemble_AllModels_…	{'__meta': {'schema_version': 99, 'schema_name': 'StackedEnsembleModelV99', 'schema_type': 'StackedEnsembleModel'}, 'model_id': {'__meta': {'schema_version': 3, 'schema_name': 'ModelKeyV3', 'schema_type': 'Key<Model>'}, 'name': 'StackedEnsemble_BestOfFamily_AutoML_20210709_054820', 'type': 'Key<Model>', 'URL': '/3/Models/StackedEnsemble_BestOfFamily_AutoML_20210709_054820'}, 'algo': 'stackedensem…	0	0		6
19158	6173	0.994753	28.1716	0.0367	3,6			0	de7fbcbc-2a42-48ff-97d9-cf211e7f4cf2	00:01:22.300000		Model Details||=============||H2OStackedEnsembleEstimator : Stacked Ensemble||Model Key: StackedEnsemble_BestOfFamily_AutoML_20210709_071601||||No model summary for this model||||ModelMetricsRegressionGLM: stackedensemble||** Reported on train data. **||||MSE: 0.001350485637292288||RMSE: 0.03674895423399539||MAE: 0.02235218804714249||RMSLE: 0.023491566136860827||R^2: 0.9803749365713648||Mean Resi…	6000	34	model_id mean_residual_deviance rmse mse mae rmsle||--------------------------------------------------- ------------------------ --------- ---------- --------- ---------||StackedEnsemble_BestOfFamily_AutoML_20210709_071601 0.00669923 0.0818489 0.00669923 0.045926 0.0597513||GBM_grid__1_AutoML_20210709_071601_model_30 0.00801064 0.0895022 0.00801064 0.0469149 0.060851||GBM_grid__1_AutoML_20210709_…	{'__meta': {'schema_version': 99, 'schema_name': 'StackedEnsembleModelV99', 'schema_type': 'StackedEnsembleModel'}, 'model_id': {'__meta': {'schema_version': 3, 'schema_name': 'ModelKeyV3', 'schema_type': 'Key<Model>'}, 'name': 'StackedEnsemble_BestOfFamily_AutoML_20210709_071601', 'type': 'Key<Model>', 'URL': '/3/Models/StackedEnsemble_BestOfFamily_AutoML_20210709_071601'}, 'algo': 'stackedensem…	0	0		6
19161	6176	0.99851	-29.0239	0.0094	0,1			0	3ca8da7b-221a-45c5-ba03-915ff5ebb47a	00:11:51.300000		Model Details||=============||H2OStackedEnsembleEstimator : Stacked Ensemble||Model Key: StackedEnsemble_AllModels_AutoML_20210710_112235||||No model summary for this model||||ModelMetricsRegressionGLM: stackedensemble||** Reported on train data. **||||MSE: 8.897987943245229e-05||RMSE: 0.009432914683831943||MAE: 0.005639796701614104||RMSLE: 0.008075447179988392||R^2: 0.9506055159039233||Mean Resi…	6000	34	model_id mean_residual_deviance rmse mse mae rmsle||--------------------------------------------------- ------------------------ --------- ----------- --------- ---------||StackedEnsemble_AllModels_AutoML_20210710_112235 0.000379662 0.0194849 0.000379662 0.0102733 0.0178099||StackedEnsemble_BestOfFamily_AutoML_20210710_112235 0.00039163 0.0197896 0.00039163 0.0100866 0.0180922||GBM_grid__1_AutoML…	{'__meta': {'schema_version': 99, 'schema_name': 'StackedEnsembleModelV99', 'schema_type': 'StackedEnsembleModel'}, 'model_id': {'__meta': {'schema_version': 3, 'schema_name': 'ModelKeyV3', 'schema_type': 'Key<Model>'}, 'name': 'StackedEnsemble_AllModels_AutoML_20210710_112235', 'type': 'Key<Model>', 'URL': '/3/Models/StackedEnsemble_AllModels_AutoML_20210710_112235'}, 'algo': 'stackedensemble', …	0	0		6
19162	6177	0.999132	-53.6635	0.0176	0,1,3			0	8a4eef4c-79d2-4048-a8e7-3aa6f4551b19	00:13:39.200000		Model Details||=============||H2OStackedEnsembleEstimator : Stacked Ensemble||Model Key: StackedEnsemble_BestOfFamily_AutoML_20210710_112642||||No model summary for this model||||ModelMetricsRegressionGLM: stackedensemble||** Reported on train data. **||||MSE: 0.00031069986738167473||RMSE: 0.017626680554820147||MAE: 0.009900968186045682||RMSLE: 0.012619397688904084||R^2: 0.9600541272936657||Mean …	6000	34	model_id mean_residual_deviance rmse mse mae rmsle||--------------------------------------------------- ------------------------ --------- ---------- --------- ---------||StackedEnsemble_BestOfFamily_AutoML_20210710_112642 0.00241618 0.0491546 0.00241618 0.0239339 0.0407559||GBM_grid__1_AutoML_20210710_112642_model_15 0.00249816 0.0499816 0.00249816 0.0225555 0.0403983||GBM_grid__1_AutoML_2021071…	{'__meta': {'schema_version': 99, 'schema_name': 'StackedEnsembleModelV99', 'schema_type': 'StackedEnsembleModel'}, 'model_id': {'__meta': {'schema_version': 3, 'schema_name': 'ModelKeyV3', 'schema_type': 'Key<Model>'}, 'name': 'StackedEnsemble_BestOfFamily_AutoML_20210710_112642', 'type': 'Key<Model>', 'URL': '/3/Models/StackedEnsemble_BestOfFamily_AutoML_20210710_112642'}, 'algo': 'stackedensem…	0	0		6
19164	6179	0.992083	95.2765	0.0012	8			0	0c83f785-8160-4c74-9c58-a6bb293994a9	00:17:02.200000		Model Details||=============||H2OStackedEnsembleEstimator : Stacked Ensemble||Model Key: StackedEnsemble_AllModels_AutoML_20210710_112536||||No model summary for this model||||ModelMetricsRegressionGLM: stackedensemble||** Reported on train data. **||||MSE: 1.5448260980937083e-06||RMSE: 0.00124291033389127||MAE: 0.0008849553086163812||RMSLE: 0.0012060808600893268||R^2: 0.9915194094514993||Mean Re…	6000	34	model_id mean_residual_deviance rmse mse mae rmsle||--------------------------------------------------- ------------------------ ---------- ----------- ---------- ----------||StackedEnsemble_AllModels_AutoML_20210710_112536 3.9783e-05 0.00630738 3.9783e-05 0.00422078 0.00610711||StackedEnsemble_BestOfFamily_AutoML_20210710_112536 4.03722e-05 0.00635391 4.03722e-05 0.00453414 0.00617328||GBM_grid_…	{'__meta': {'schema_version': 99, 'schema_name': 'StackedEnsembleModelV99', 'schema_type': 'StackedEnsembleModel'}, 'model_id': {'__meta': {'schema_version': 3, 'schema_name': 'ModelKeyV3', 'schema_type': 'Key<Model>'}, 'name': 'StackedEnsemble_AllModels_AutoML_20210710_112536', 'type': 'Key<Model>', 'URL': '/3/Models/StackedEnsemble_AllModels_AutoML_20210710_112536'}, 'algo': 'stackedensemble', …	0	0		6
19178	6193	0.99793	75.3581	0.0182	1			0	6eb1e6a7-e4bb-4760-9320-44f20203cea7	00:53:05.100000		Model Details||=============||H2OStackedEnsembleEstimator : Stacked Ensemble||Model Key: StackedEnsemble_BestOfFamily_AutoML_20210712_070540||||No model summary for this model||||ModelMetricsRegressionGLM: stackedensemble||** Reported on train data. **||||MSE: 0.00033008249378074154||RMSE: 0.018168172549289086||MAE: 0.012570381124152942||RMSLE: 0.014090642385201652||R^2: 0.9682582798925102||Mean …	6000	34	model_id mean_residual_deviance rmse mse mae rmsle||--------------------------------------------------- ------------------------ --------- ---------- --------- ---------||StackedEnsemble_BestOfFamily_AutoML_20210712_070540 0.00264966 0.0514748 0.00264966 0.0291535 0.0421069||StackedEnsemble_AllModels_AutoML_20210712_070540 0.00274688 0.0524107 0.00274688 0.0273999 0.0424486||GBM_grid__1_AutoML_20…	{'__meta': {'schema_version': 99, 'schema_name': 'StackedEnsembleModelV99', 'schema_type': 'StackedEnsembleModel'}, 'model_id': {'__meta': {'schema_version': 3, 'schema_name': 'ModelKeyV3', 'schema_type': 'Key<Model>'}, 'name': 'StackedEnsemble_BestOfFamily_AutoML_20210712_070540', 'type': 'Key<Model>', 'URL': '/3/Models/StackedEnsemble_BestOfFamily_AutoML_20210712_070540'}, 'algo': 'stackedensem…	0	0		6
19179	6194	0.981013	2.1153	0.1813	6			0	c47a8328-e2f5-467d-9ec4-aa72c70686ae	00:07:31.400000		Model Details||=============||H2OStackedEnsembleEstimator : Stacked Ensemble||Model Key: StackedEnsemble_BestOfFamily_AutoML_20210713_072228||||No model summary for this model||||ModelMetricsRegressionGLM: stackedensemble||** Reported on train data. **||||MSE: 0.03288338273820965||RMSE: 0.18133775872170046||MAE: 0.13449137784460535||RMSLE: 0.11006191607969565||R^2: 0.9781294317026742||Mean Residu…	6000	34	model_id mean_residual_deviance rmse mse mae rmsle||--------------------------------------------------- ------------------------ -------- -------- -------- --------||StackedEnsemble_BestOfFamily_AutoML_20210713_072228 0.297173 0.545136 0.297173 0.35082 0.249238||StackedEnsemble_AllModels_AutoML_20210713_072228 0.303044 0.550494 0.303044 0.345627 0.240238||GBM_grid__1_AutoML_20210713_072228_model_…	{'__meta': {'schema_version': 99, 'schema_name': 'StackedEnsembleModelV99', 'schema_type': 'StackedEnsembleModel'}, 'model_id': {'__meta': {'schema_version': 3, 'schema_name': 'ModelKeyV3', 'schema_type': 'Key<Model>'}, 'name': 'StackedEnsemble_BestOfFamily_AutoML_20210713_072228', 'type': 'Key<Model>', 'URL': '/3/Models/StackedEnsemble_BestOfFamily_AutoML_20210713_072228'}, 'algo': 'stackedensem…	0	0		6
19180	6195	0.995826	-336.632	0.0705	6			0	c3beeae3-887d-4653-a338-32d426828172	00:09:08.800000		Model Details||=============||H2OStackedEnsembleEstimator : Stacked Ensemble||Model Key: StackedEnsemble_AllModels_AutoML_20210713_072206||||No model summary for this model||||ModelMetricsRegressionGLM: stackedensemble||** Reported on train data. **||||MSE: 0.004971695601418705||RMSE: 0.07051025174695312||MAE: 0.046416983917021246||RMSLE: 0.04377572327060248||R^2: 0.9271427164843197||Mean Residua…	6000	34	model_id mean_residual_deviance rmse mse mae rmsle||--------------------------------------------------- ------------------------ -------- --------- --------- --------||StackedEnsemble_AllModels_AutoML_20210713_072206 0.0250877 0.158391 0.0250877 0.0883773 0.106987||StackedEnsemble_BestOfFamily_AutoML_20210713_072206 0.0260841 0.161506 0.0260841 0.0839854 0.107589||GBM_grid__1_AutoML_20210713_0722…	{'__meta': {'schema_version': 99, 'schema_name': 'StackedEnsembleModelV99', 'schema_type': 'StackedEnsembleModel'}, 'model_id': {'__meta': {'schema_version': 3, 'schema_name': 'ModelKeyV3', 'schema_type': 'Key<Model>'}, 'name': 'StackedEnsemble_AllModels_AutoML_20210713_072206', 'type': 'Key<Model>', 'URL': '/3/Models/StackedEnsemble_AllModels_AutoML_20210713_072206'}, 'algo': 'stackedensemble', …	0	0		6

## Sheet: Table S6
Table S6: HPLC-UVDAD reference method specifications. Includes cannabinoids, molecular mass of cannabinoids, UV-DAD wavelengths for cannabinoid quantification, the selected ion used to validate the cannabinoid identity using MS detection (SIM) and the relative retention times.
	Cannabinoid	Molecular Mass	UV-DAD wavelength (nm)	Selected Ion Monitoring (SIM)	Retention Time (min)	Limit of quantification (LOQ)	Limit of detection (LOD)	Conversion factors
	CBDVA	330.4	274	331	8.5 ± 0.1 %	0.001	0.0001	0.921618
	CBDV	286.4	210	287	9.0 ± 0.1 %	0.001	0.0001	0.910652				1
	CBDA	358.5	274	359	10.8 ± 0.1 %	0.0001	5e-05	1
	CBGA	360.5	274	361	11.2 ± 0.1 %	0.001	0.0001	1.14626
	CBG	316.5	210	317	11.5 ± 0.1 %	0.001	0.0001	1.00636
	CBD	314.5	210	315	12.6 ± 0.1 %	0.0001	5e-05	1
	CBN	310.4	210	315	13.0 ± 0.1 %	0.001	0.0001	0.986963
	THCV	286.4	210	287	14.6 ± 0.1 %	0.001	0.0001	0.910652
	THCVA	330.4	274	287	15.0 ± 0.1 %	0.001	0.0001	1.08505
	Δ9-THC	314.5	210	315	16.8 ± 0.1 %	0.0001	5e-05	1
	CBC	314.5	210	315	18.2 ± 0.1 %	0.001	0.0001	1
	Δ9-THCA	358.5	274	359	19.5 ± 0.1 %	0.0001	5e-05	1
CBDVA=Cannabidivarinic acid, CBDV=Cannabidivarin, CBDA=Cannabidiolic acid, CBGA=Cannabigerolic acid, CBG=Cannabigerol, CBD=Cannabidiol, THCV=Tetrahydrocannabivarin, CBN=Cannabinol, THCVA= Tetrahydrocannabivarinic Acid, Δ9-THC=Tetradydrocannabinolic, CBC=Cannabichromene, Δ9-THCA=Tetradydrocannabinolic Acid
Exemplary chromatograph of a quality control sample and respective identified cannabinoids. Unnamed peaks were not identified for cannabinoids and model building.
